# Supplementary material
Source: PubMed Central journal article supplement (PMC4807515)
Supplement: AEM.03336-15_zam999117041so1.pdf [file AEM.03336-15_zam999117041so1.pdf]

## Supplemental material

### The composition of airborne and grain-dust fungal communities is shaped at regional scale by plant genotypes and farming practices

Loïc Pellissier, Anne Oppliger, Alexandre H. Hirzel, Dessislava Savova-Bianchi, Guilain Mbayo, Fabio Mascher, Stefan Kellenberger, H el ene Niculita-Hirzel

The following Supporting Information is available for this article:

**Fig. S1.** Number of freezing days (**A.**) and elevation (**B.**) in the study area.

**Fig. S2.** Climatic information. **A.** Location of the weather stations. **B., D., F.** Mean precipitation levels during June, July and August 2010, respectively. **C., E., G.** Mean temperatures during June, July and August 2010, respectively.

**Table S1.** Fungicide treatments of the fields

**Table S2.** Weather indicators during aerosol sampling and duration of sampling

**Table S3.** Variables considered in the analysis of fungal alpha and beta diversity

**Table S4.** Good's coverage values and sequence data characteristics of samples

**Table S5.** Taxonomic assignment of the OTUs. The species known to be involved in wheat diseases or to produce secondary metabolites that are toxic for humans (mycotoxins) are mentioned when the OTUs present a sequence identity >96%.

**Table S6.** Frequency of the OTUs with at least two reads in aerosol and grain dust samples depending on the farming system

FIG S1.

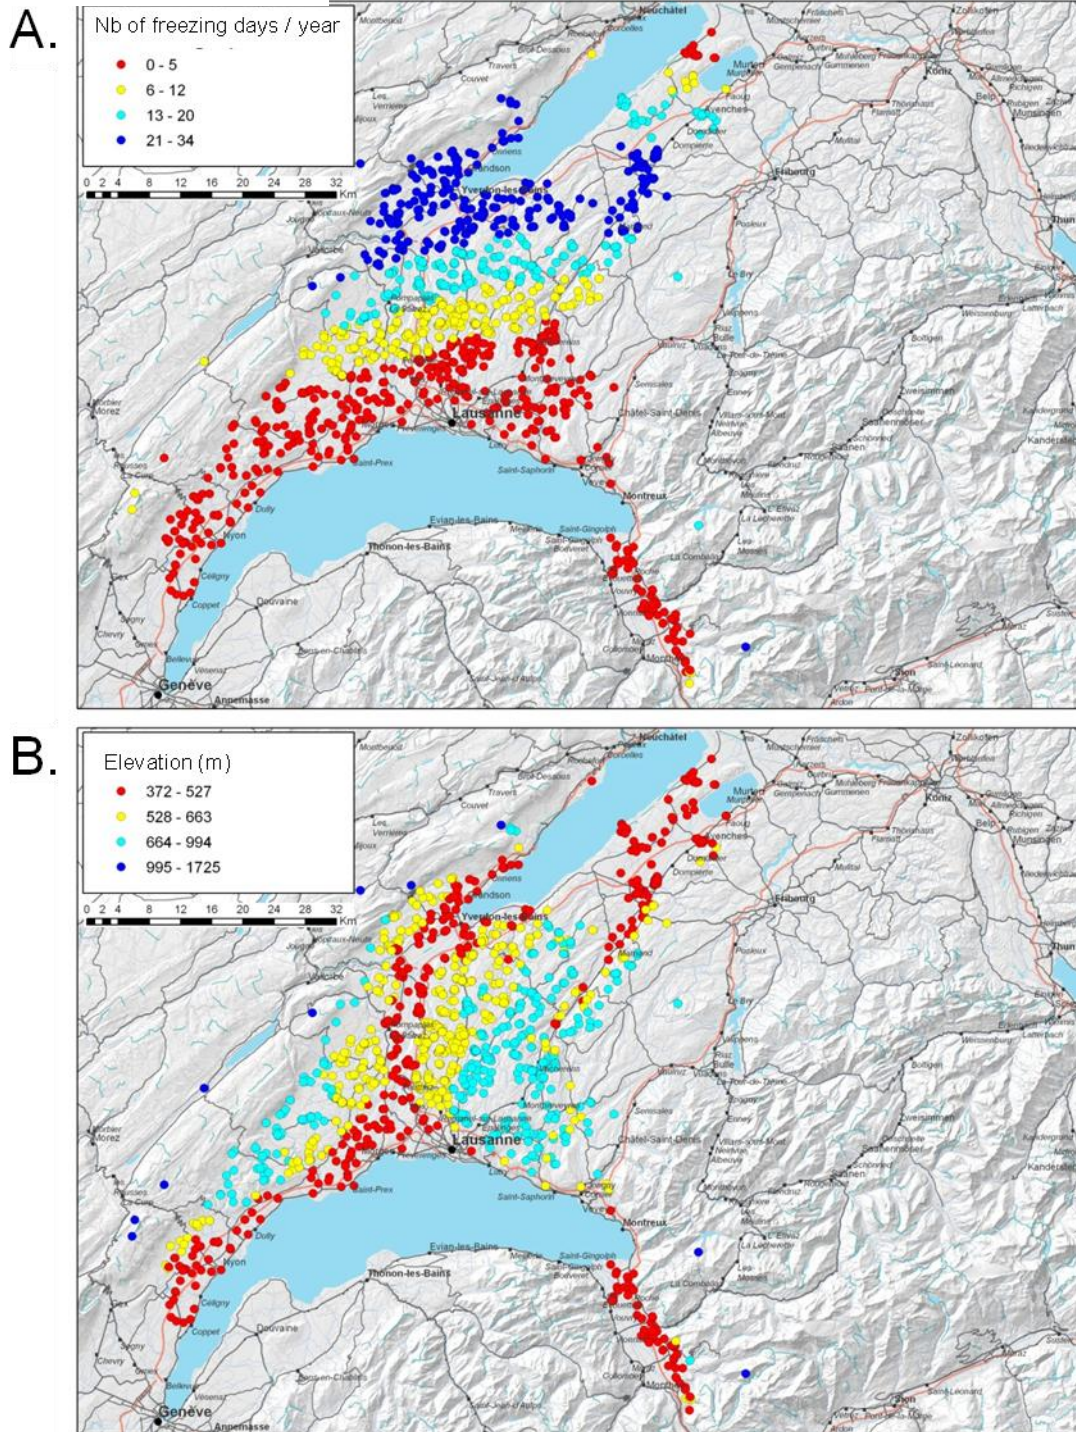

**FIG S2.**

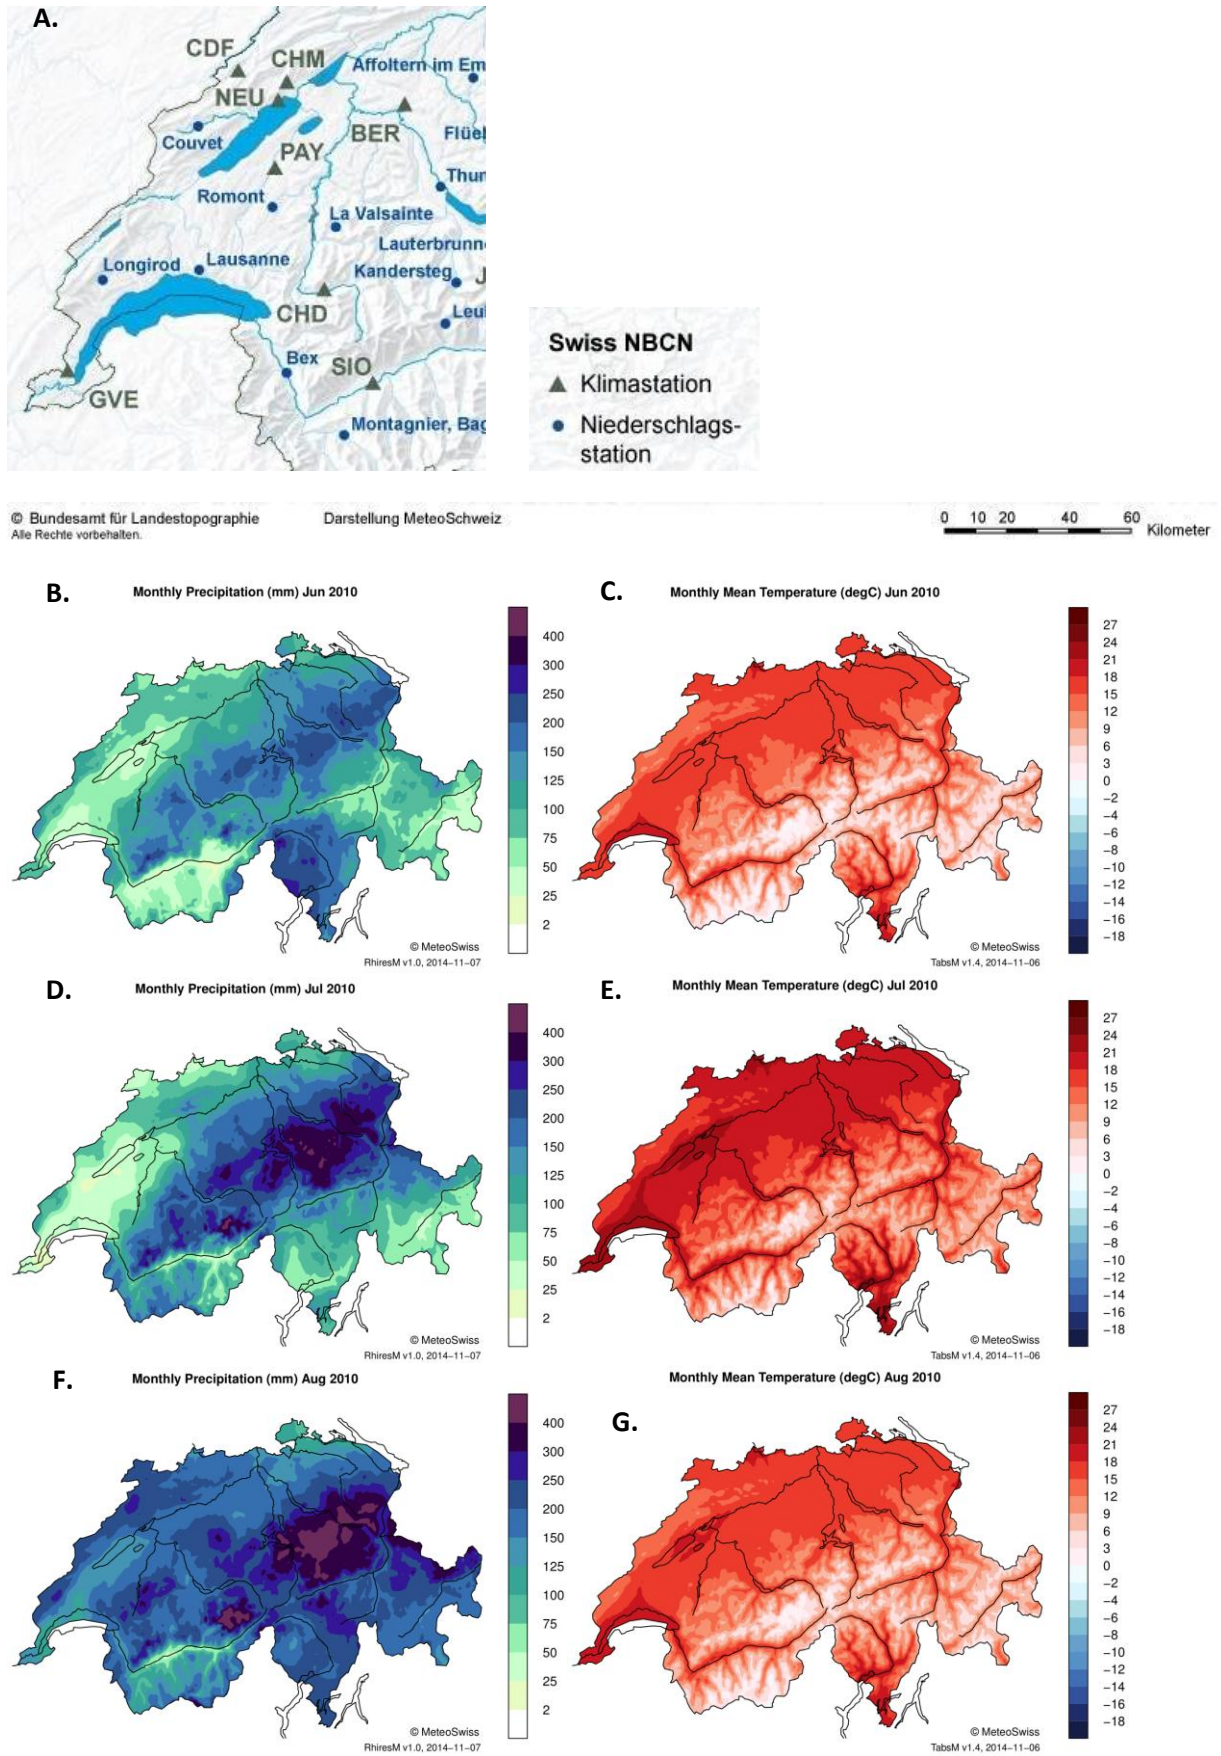

**Table S1.** Fields characteristics and fungicide treatments

| Field ID | Farming system | Cultivar   | Precedent crop culture | Elevation (m) | Surface (ha) |
|----------|----------------|------------|------------------------|---------------|--------------|
| 84       | conventional   | Arina      | peas                   | 458           | 1.96         |
| 144      | conventional   | Zinal      | sugar beet             | 412           | 3.25         |
| 245      | conventional   | Zinal      | sunflower              | 620           | 1.35         |
| 192      | conventional   | Ludwig     | rapeseed               | 601           | 0.72         |
| 12       | conventional   | Mulan      | corn                   | 386           | 1.90         |
| 11       | conventional   | Mulan      | sunflower              | 445           | 1.17         |
| 78       | conventional   | Tommy      | rapeseed               | 525           | 7.50         |
| 14       | conventional   | Claro      | corn                   | 478           | 4.40         |
| 274      | conventional   | Claro      | rapeseed               | 663           | 1.30         |
| 22       | conventional   | Runal      | potatoes               | 422           | 5.30         |
| 272      | conventional   | Impression | sugar beet + corn      | 782           | 2.48         |
| 74       | conventional   | Ludwig     | rapeseed               | 566           | 2.80         |
| 250      | conventional   | Sciala     | meadow                 | 751           | 2.40         |
| 258      | conventional   | Impression | flax                   | 705           | 0.80         |
| 247      | conventional   | Zinal      | corn                   | 591           | 6.00         |
| 204      | conventional   | Impression | sugar beet             | 522           | 3.75         |
| 203      | conventional   | Ludwig     | corn                   | 463           | 1.50         |
| 67       | conventional   | Combin     | rapeseed               | 436           | 4.17         |
| 33       | conventional   | Runal      | peas                   | 615           | 1.50         |
| 273      | conventional   | Manhattan  | sugar beet             | 673           | 1.55         |
| 66       | conventional   | Forel      | sugar beet             | 467           | 2.40         |
| 66       | conventional   | Forel      | corn                   | 467           | 5.00         |
| 182      | conventional   | Sciala     | sugar beet             | 699           | 1.50         |
| 248      | conventional   | Tapidor    | sugar beet             | 815           |              |
| 196      | conventional   | Sciala     | corn                   | 681           | 3.20         |
| 231      | conventional   | Arina      | potatoes               | 826           |              |
| 183      | conventional   | Sciala     | potatoes               | 690           | 2.00         |
| 211      | conventional   | Zinal      | meadow                 | 790           |              |
| 148      | conventional   | Titlis     | sugar beet             | 599           | 3.60         |
| 127      | conventional   | Zinal      | rapeseed               | 680           | 1.60         |
| 226      | conventional   | Zinal      | rapeseed               | 686           | 1.65         |
| 69       | conventional   | Titlis     | rapeseed + sunflower   | 597           | 5.90         |
| 161      | conventional   | Lewis      | rapeseed               | 606           | 1.96         |
| 220      | conventional   | Soisson    | celery                 | 395           | 8.34         |
| 167      | conventional   | Ludwig     | rapeseed               | 652           | 1.55         |
| 215      | conventional   | Lewis      | sugar beet + rapeseed  | 590           | 4.20         |
| 228      | conventional   | Sciala     | rapeseed               | 600           | 4.22         |
| 169      | conventional   | Manhattan  | sugar beet             | 493           | 3.00         |
| 7        | conventional   | Arina      | potatoes               | 836           | 2.85         |
| 75       | conventional   | Apache     |                        |               |              |

| Field ID | Farming system | Cultivar   | Precedent crop culture | Elevation (m) | Surface (ha) |
|----------|----------------|------------|------------------------|---------------|--------------|
| 229      | conventional   | Lewis      |                        | 602           |              |
| 271      | conventional   | Runal      | sugar beet             | 661           |              |
| 26       | conventional   | Zinal      | sugar beet             | 467           |              |
| 260      | conventional   | Zinal      | sugar beet             | 668           |              |
| 13       | conventional   | Zinal      | sugar beet             | 456           |              |
| 249      | conventional   | Arina      | rapeseed               | 822           |              |
| 275      | conventional   | Sciala     | rapeseed               | 771           |              |
| 29       | conventional   | Zinal      | rapeseed               | 511           |              |
| 27       | conventional   | Claro      | corn                   | 497           |              |
| 28       | conventional   | Claro      | corn                   |               |              |
| 195      | conventional   | Claro      | corn                   | 830           |              |
| 62       | conventional   | Lewis      | corn                   | 608           |              |
| 209      | conventional   | Arina      | potatoes               | 836           |              |
| 79       | conventional   | Manhattan  | potatoes               | 569           |              |
| 24       | conventional   | Ludwig     | peas                   | 449           |              |
| 24       | conventional   | Ludwig     | peas                   | 449           |              |
| 190      | conventional   | mix        | peas + sugar beet      | 632           |              |
| 267      | conventional   | Claro      | meadow + potatoes      | 781           |              |
| 256      | conventional   | Arina      | sunflower              | 651           |              |
| 168      | conventional   | Sciala     | sunflower              | 475           |              |
| 261      | conventional   | Impression | sunflower + rapeseed   | 649           |              |
| 233      | conventional   | Arina      |                        | 787           |              |
| 15       | conventional   | Claro      |                        | 475           |              |
| 216      | conventional   | Manhattan  |                        | 542           |              |
| 163      | conventional   | mix        |                        | 433           |              |
| 72       | conventional   | Triticale  |                        | 572           |              |
| 125      | conventional   | Triticale  |                        | 432           |              |
| 63       | conventional   | Zinal      |                        | 501           |              |
| 246      | extensive      | Forel      | sugar beet             | 673           |              |
| 225      | extensive      | Ludwig     | wheat                  | 514           | 0.90         |
| 140      | extensive      | Manhattan  | rapeseed               | 437           |              |
| 64       | extensive      | Manhattan  | rapeseed               | 601           | 3.10         |
| 210      | extensive      | Runal      | rapeseed               | 666           | 2.55         |
| 212      | extensive      | Runal      | rapeseed               | 666           | 2.55         |
| 17       | extensive      | Sciala     | rapeseed               | 547           |              |
| 230      | extensive      | Galaxy     | rapeseed               | 776           | 3.50         |
| 208      | extensive      | Titlis     | rapeseed + peas        | 687           |              |
| 128      | extensive      | Sciala     | meadow                 | 552           |              |
| 153      | extensive      | Forel      | corn                   | 621           |              |
| 34       | extensive      | Forel      | corn                   | 597           | 2.63         |
| 48       | extensive      | Ludwig     | corn                   | 603           |              |
| 49       | extensive      | Ludwig     | corn                   | 603           |              |

| Field ID | Farming system | Cultivar    | Precedent crop culture      | Elevation (m) | Surface (ha) |
|----------|----------------|-------------|-----------------------------|---------------|--------------|
| 236      | extensive      | Sciala      | corn                        | 798           | 1.90         |
| 237      | extensive      | Sciala      | corn                        | 650           | 2.25         |
| 18       | extensive      | Sciala      | corn                        | 415           |              |
| 16       | extensive      | Sciala      | potatoes                    | 462           | 4.00         |
| 257      | extensive      | Lewis       | peas + potatoes + oats      | 726           | 3.10         |
| 230      | extensive      | Galaxy      | meadow                      | 776           | 0.75         |
| 70       | extensive      | Runal       | meadow                      | 509           | 0.80         |
| 70       | extensive      | Runal       | meadow                      | 509           | 0.50         |
| 23       | extensive      | Forel       |                             | 474           |              |
| 213      | extensive      | Sciala      |                             | 741           |              |
| 162      | organic        | Wiva        | rapeseed                    | 619           | 2.90         |
| 71       | organic        | Scaro       | rapeseed + sunflower + flax | 472           |              |
| 65       | organic        | Scaro       | peas + sunflower            | 504           |              |
| 19       | organic        | Pollux      | meadow                      | 415           | 0.90         |
| 154      | organic        | Wiva        | meadow                      | 416           |              |
| 232      | organic        | Wiva        | meadow                      | 644           |              |
| 193      | organic        | Scaro       | salad + corn                | 437           |              |
| 139      | organic        | Spelt wheat | soybeans                    | 464           |              |
| 214      | organic        | Triticale   | Triticale                   | 695           |              |
| 234      | organic        | Spelt wheat |                             | 847           |              |

| First fungicide application |                     |                                 |                     |                   |                 |
|-----------------------------|---------------------|---------------------------------|---------------------|-------------------|-----------------|
| Field ID                    | Fungicide name      | Active ingredient               | Date of application | BBCH growth stage | Quantity (L/ha) |
| 84                          | Amistar             | azoxystrobine                   | 21.5.2010           | 55                | 1,00            |
| 144                         | Amistar             | azoxystrobine                   | 25.5.2010           | 51                | 1,00            |
| 245                         | Amistar             | azoxystrobine                   | 29.4.2010           | 32                | 1,00            |
| 192                         | Bravo 500           | chlorothalonil                  | 24.5.2010           |                   | 1,50            |
| 12                          | Bravo 500           | chlorothalonil                  | 17.05.2010          | 37                | 1,5             |
| 11                          | Bravo 500           | chlorothalonil                  | 17.05.2010          | 37                | 1,5             |
| 78                          | Unix                | cyprodinil                      | 19.4.2010           | 30                | 0,8             |
| 14                          | Unix + Amistar Xtra | cyprodinil + azoxystrobine      | 10.5.2010           | 311               | 0.8g + 1,00     |
| 274                         | Stéreo Eco          | cyprodinil, propiconazole       | 25.4.2010           | 31                | 2,50            |
| 22                          | Stéreo Eco          | cyprodinil, propiconazole       | 23.4.2010           | 030               | 02,50           |
| 272                         | Stéreo Eco          | cyprodinil, propiconazole       | 25.5.2010           | 31/32             | 2,50            |
| 74                          | Avenir Pro          | difenoconazole, propiconazole   | 25.5.2010           | 51                | 0,50            |
| 250                         | Bell                | epoxiconazole,boscalid          | 10.5.2010           | 32                | 1,00            |
| 258                         | Bell                | epoxiconazole,boscalid          | 18.5.2010           | 32                | 1,50            |
| 247                         | Bell                | epoxiconazole,boscalid          | 22.4.2010           | 35                | 1,50            |
| 204                         | Bell                | epoxiconazole,boscalid          | 28.4.2010           |                   | 1,50            |
| 203                         | Bell                | epoxiconazole,boscalid          | 26.5.2010           | 33                | 1,30            |
| 67                          | Gladio              | fenpropidine, propiconazole     | 25.5.2010           | 48                | 1000 g          |
| 33                          | Flamenco Plus       | fluquinconazole, prochloraz     | 7.4.2010            | 30                | 2,30            |
| 273                         | Capitan S           | flusilazole                     | 18.5.2010           |                   | 1,20            |
| 66                          | Sportak             | prochloraz                      | 22.4.2010           | 30                | 1,00            |
| 66                          | Sportak             | prochloraz                      | 22.4.2010           | 30                | 1,00            |
| 182                         | Sportak             | prochloraz                      | 28.4.2010           | 31                | 1,00            |
| 248                         | Sportak             | prochloraz                      | 25.5.2010           | 32                | 1,00            |
| 196                         | Sportak             | prochloraz                      | 28.4.2010           | 31                | 1,00            |
| 231                         | Sportak             | prochloraz                      | 10.5.2010           | 31                | 1,00            |
| 183                         | Sportak             | prochloraz                      | 28.4.2010           | 31                | 1,00            |
| 211                         | Sportak             | prochloraz                      | 25.5.2010           | 32                | 1,00            |
| 148                         | Fandango            | prothioconazole, fluoxastrobine | 20.4.2010           | 30                | 1,00            |
| 127                         | Fandango            | prothioconazole, fluoxastrobine | 24.6.2010           | 50                | 1,50            |
| 226                         | Fandango            | prothioconazole, fluoxastrobine | 24.6.2010           | 50                | 1,50            |
| 69                          | Fandango            | prothioconazole, fluoxastrobine | 20.4.2010           | 30                | 1,00            |
| 161                         | Input               | prothioconazole, spiroxamine    | 8.5.2010            | 30                | 1,25            |
| 220                         | Input               | prothioconazole, spiroxamine    | 23.4.2010           |                   | 1,25            |
| 167                         | Input               | prothioconazole, spiroxamine    | 17.5.2010           | 31,5              | 1,25            |
| 215                         | Input               | prothioconazole, spiroxamine    | 22.4.2010           | 35                | 1,25            |
| 228                         | Input               | prothioconazole, spiroxamine    | 22.4.2010           | 37                | 1,25            |
| 169                         | Input               | prothioconazole, spiroxamine    | 31.5.2010           | 51                | 1,25            |
| 7                           | Métro               |                                 | 11.5.2010           | 31                | 0,50            |

| Second fungicide application |                    |                                                          |                     |                   |                 |
|------------------------------|--------------------|----------------------------------------------------------|---------------------|-------------------|-----------------|
| Field ID                     | Fungicide name     | Active ingredient                                        | Date of application | BBCH growth stage | Quantity (L/ha) |
| 84                           | Bravo 500          | chlorothalonil                                           | 21.05.2010          | 55                | 1,00            |
| 144                          |                    |                                                          |                     |                   |                 |
| 245                          |                    |                                                          |                     |                   |                 |
| 192                          | Gladio             | fenpropidine, propiconazol, tebuconazol                  | 24.05.2010          |                   | 1,00            |
| 12                           |                    |                                                          |                     |                   |                 |
| 11                           |                    |                                                          |                     |                   |                 |
| 78                           | Amistar            | azoxystrobine                                            | 19.04.2010          | 30                | 1,00            |
| 14                           | Gladio + Bravo 500 | fenpropidine, propiconazol, tebuconazol + chlorothalonil | 26.05.2010          | 391               | 1,00            |
| 274                          | Amistar Xtra       | azoxystrobine                                            | 27.05.2010          | 51                | 1,00            |
| 22                           | Gladio             | fenpropidine, propiconazol, tebuconazol                  | 25.05.2010          | 037               | 1,00            |
| 272                          | Casac              | tebuconazole, prothioconazole                            | 9.06.2010           | 39                | 1,00            |
| 74                           |                    |                                                          |                     |                   |                 |
| 250                          | Bravo 500          | chlorothalonil                                           | 7.6.2010            |                   | 2,50            |
| 258                          | Gladio             | fenpropidine, propiconazol, tebuconazol                  | 02.06.2010          |                   | 1,00            |
| 247                          | Proline            | prothioconazole                                          | 27.05.2010          |                   | 0,80            |
| 204                          |                    |                                                          |                     |                   |                 |
| 203                          |                    |                                                          |                     |                   |                 |
| 67                           |                    |                                                          |                     |                   |                 |
| 33                           | Casac              | tebuconazole, prothioconazole                            | 28.05.2010          | 51                | 1,00            |
| 273                          | Amistar Xtra       | azoxystrobine                                            | 10.06.2010          |                   | 1,00            |
| 66                           | Proline            | prothioconazole                                          | 25.05.2010          | 50                | 0,80            |
| 66                           | Proline            | prothioconazole                                          | 25.05.2010          | 50                | 0,80            |
| 182                          | Fandango           | prothioconazole, fluoxastrobine                          | 22.05.2010          | 50                | 1,50            |
| 248                          | Fandango           | prothioconazole, fluoxastrobine                          | 4.6.2010            | 45                | 1,50            |
| 196                          | Fandango           | prothioconazole, fluoxastrobine                          | 22.05.2010          | 50                | 1,50            |
| 231                          | Fandango           | prothioconazole, fluoxastrobine                          | 26.5.2010           | 45                | 1,50            |
| 183                          | Fandango           | prothioconazole, fluoxastrobine                          | 22.03.2010          | 50                | 1,50            |
| 211                          | Fandango           | prothioconazole, fluoxastrobine                          | 4.6.2010            | 45                | 1500 g/ha       |
| 148                          |                    |                                                          |                     |                   |                 |
| 127                          |                    |                                                          |                     |                   |                 |
| 226                          |                    |                                                          |                     |                   |                 |
| 69                           |                    |                                                          |                     |                   |                 |
| 161                          | Agora SC           | cyproconazole, trifloxystrobine                          | 29.05.2010          | 47-49             | 0,50            |
| 220                          | Allegro            | epoxiconazole, kresoxim-methyl                           | 24.05.2010          |                   | 1,00            |
| 167                          | Allegro            | epoxiconazole, kresoxim-methyl                           | 04.06.2010          | 45                | 1,00            |
| 215                          | Proline            | prothioconazole                                          | 31.05.2010          |                   | 0,80            |
| 228                          | Proline            | prothioconazole                                          | 26.05.2010          |                   | 0,80            |
| 169                          |                    |                                                          |                     |                   |                 |
| 7                            | Input              | prothioconazole, spiroxamine                             | 11.05.2010          | 31                | 1,25            |



| Third fungicide application |                  |                                                          |                     |                   |                 |
|-----------------------------|------------------|----------------------------------------------------------|---------------------|-------------------|-----------------|
| Field ID                    | Fungicide name   | Active ingredient                                        | Date of application | BBCH growth stage | Quantity (L/ha) |
| 84                          |                  |                                                          |                     |                   |                 |
| 144                         |                  |                                                          |                     |                   |                 |
| 245                         |                  |                                                          |                     |                   |                 |
| 192                         |                  |                                                          |                     |                   |                 |
| 12                          |                  |                                                          |                     |                   |                 |
| 11                          |                  |                                                          |                     |                   |                 |
| 78                          | Gladio+Bravo 500 | fenpropidine, propiconazol, tebuconazol + chlorothalonil | 15.5.2010           | 51                | 1,00            |
| 14                          |                  |                                                          |                     |                   |                 |
| 274                         |                  |                                                          |                     |                   |                 |
| 22                          | Bravo 500        | chlorothalonil                                           | 25.05.2010          | 037               | 1,00            |
| 272                         |                  |                                                          |                     |                   |                 |
| 74                          |                  |                                                          |                     |                   |                 |
| 250                         |                  |                                                          |                     |                   |                 |
| 258                         |                  |                                                          |                     |                   |                 |
| 247                         |                  |                                                          |                     |                   |                 |
| 204                         |                  |                                                          |                     |                   |                 |
| 203                         |                  |                                                          |                     |                   |                 |
| 67                          |                  |                                                          |                     |                   |                 |
| 33                          |                  |                                                          |                     |                   |                 |
| 273                         |                  |                                                          |                     |                   |                 |
| 66                          |                  |                                                          |                     |                   |                 |
| 66                          |                  |                                                          |                     |                   |                 |
| 182                         |                  |                                                          |                     |                   |                 |
| 248                         |                  |                                                          |                     |                   |                 |
| 196                         |                  |                                                          |                     |                   |                 |
| 231                         |                  |                                                          |                     |                   |                 |
| 183                         |                  |                                                          |                     |                   |                 |
| 211                         |                  |                                                          |                     |                   |                 |
| 148                         |                  |                                                          |                     |                   |                 |
| 127                         |                  |                                                          |                     |                   |                 |
| 226                         |                  |                                                          |                     |                   |                 |
| 69                          |                  |                                                          |                     |                   |                 |
| 161                         | Miros Fl         |                                                          | 29.05.2010          | 47-49             | 0,07            |
| 220                         |                  |                                                          |                     |                   |                 |
| 167                         |                  |                                                          |                     |                   |                 |
| 215                         |                  |                                                          |                     |                   |                 |
| 228                         |                  |                                                          |                     |                   |                 |
| 169                         |                  |                                                          |                     |                   |                 |
| 7                           | Agora            | cyproconazole,trifloxystrobine                           | 07.06.2010          | 47                | 0,50            |

**Table S2.** Weather indicators during aerosol sampling and duration of sampling in 2010

| Field ID | Sampling hour | Sampling day | Harvester speed (ha/h) | Temperature at soil level (°C) | Relative Humidity (%) | Atmospheric pressure (Pa) | Wind             | Weather | Air volume sampled (m3) | Considered in 454-data analyses | Farming system | Cultivar  | Duration (min) |
|----------|---------------|--------------|------------------------|--------------------------------|-----------------------|---------------------------|------------------|---------|-------------------------|---------------------------------|----------------|-----------|----------------|
| 11       | 15:48         | 15-07-       | 1,5                    | 44                             | 22                    | 967                       | low              | sunny   | 0.126                   | Yes                             | conventional   | ND        | 63             |
| 12       | 14:16         | 15-07-       | 1,5                    | 44                             | 16                    | 973                       | low              | sunny   | 0.152                   | Yes                             | conventional   | ND        | 76             |
| 13       | 17:45         | 16-07-       | 1,0                    | 36                             | 29                    | 966                       | NA               | cloudy  | 0.080                   | Yes                             | conventional   | Zinal     | 40             |
| 14       | 18:05         | 15-07        | 1,0                    | 34                             | 29                    | 962                       | absent           | sunny   | 0.212                   | Yes                             | conventional   | Claro     | 106            |
| 15       | 21:00         | 15-07        | 1,0                    | 26                             | 46                    | 967                       | absent           | sunny   | 0.058                   | Yes                             | conventional   | Claro     | 29             |
| 16       | 13:15         | 16-07        | 1,5                    | 41                             | 22                    | 965                       | low              | sunny   | 0.154                   | Yes                             | extensive      | Siala     | 77             |
| 17       | 20:30         | 16-07        | 2,2                    | 30                             | 32                    | 957                       | NA               | NA      | 0.162                   | No                              | conventional   | Siala     | 81             |
| 19       | 10:45         | 16-07        | 1,5                    | 30                             | 40                    | 970                       | low              | sunny   | 0.120                   | Yes                             | organic        | Pollux    | 60             |
| 20       | 14:35         | 16-07        | 1,5                    | 28                             | 44                    | 961                       | low              | sunny   | 0.023                   | Yes                             | extensive      | Claro     | 11             |
| 22       | 17:00         | 19-07        | 1,5                    | 37                             | 25                    | 971                       | absent           | sunny   | 0.314                   | Yes                             | conventional   | Runal     | 157            |
| 23       | 19:15         | 17-07        | 1,5                    | 20                             | 49                    | 973                       | NA               | NA      | 0.250                   | Yes                             | extensive      | Forel     | 125            |
| 24       | 01:30         | 18-07        | 1,0                    | 17                             | 55                    | 976                       | absent           | sunny   | 0.120                   | Yes                             | conventional   | Ludwig    | 60             |
| 27       | 21:54         | 17-07        | 1,0                    | 18                             | 54                    | 969                       | NA               | NA      | 0.122                   | No                              | conventional   | ND        | 61             |
| 27       | 21:54         | 17-07        | 1,0                    | 18                             | 54                    | 969                       | NA               | NA      | 0.230                   | Yes                             | conventional   | ND        | 115            |
| 28       | 23:55         | 17-07        | 1,5                    | 18                             | 54                    | 969                       | low              | cloudy  | 0.100                   | Yes                             | conventional   | Claro     | 50             |
| 29       | 14:40         | 18-07        | 2,0                    | 35                             | 21                    | 965                       | strong           | sunny   | 0.144                   | Yes                             | conventional   | Zinal     | 72             |
| 34       | 22:30         | 16-07        | 2,2                    | 25                             | 37                    | 952                       | absent           | cloudy  | 0.204                   | Yes                             | extensive      | Ludwig    | 102            |
| 62       | 22:00         | 21-07        | 2,0                    | 25                             | 50                    | 948                       | absent           | cloudy  | 0.120                   | Yes                             | conventional   | Levis     | 60             |
| 63       | 75:00         | 19-07        | 0,7                    | 37                             | 22                    | 965                       | low              | sunny   | 0.160                   | Yes                             | conventional   | Zinal     | 80             |
| 64       | 18:00         | 18-07        | 2,0                    | 31                             | 26                    | 955                       | strong           | sunny   | 0.100                   | Yes                             | extensive      | Manhattan | 50             |
| 65       | 13:50         | 19-07        | 0,5                    | 35                             | 25                    | 965                       | low              | sunny   | 0.502                   | Yes                             | organic        | Scaro     | 251            |
| 67       | 14:25         | 21-07        | 1,5                    | 39                             | 20                    | 962                       | middle intensity | sunny   | 0.136                   | Yes                             | conventional   | Combin    | 68             |
| 69       | 17:15         | 26-07        | 1,5                    | 26                             | 37                    | 951                       | absent           | cloudy  | 0.296                   | Yes                             | conventional   | Titlis    | 148            |
| 70       | 14:30         | 26-07        | 1,5                    | 27                             | 35                    | 959                       | absent           | cloudy  | 0.096                   | Yes                             | extensive      | Runal     | 48             |
| 71       | 11:00         | 26-07        | 1,5                    | 32                             | 31                    | 965                       | absent           | sunny   | 0.310                   | Yes                             | organic        | Scaro     | 155            |
| 72       | 13:30         | 21-07        | 2,0                    | 37                             | 32                    | 949                       | NA               | NA      | 0.046                   | Yes                             | conventional   | Triticale | 23             |

| Field ID | Sampling hour | Sampling day | Harvester speed (ha/h) | Temperature at soil level (°C) | Relative Humidity (%) | Atmospheric pressure (Pa) | Wind             | Weather | Air volume sampled (m3) | Considered in 454-data analyses | Farming system | Cultivar    | Duration (min) |
|----------|---------------|--------------|------------------------|--------------------------------|-----------------------|---------------------------|------------------|---------|-------------------------|---------------------------------|----------------|-------------|----------------|
| 74       | 15:43         | 21-07        | 1,0                    | 33                             | 28                    | 945                       | low              | NA      | 0.132                   | Yes                             | conventional   | Ludwig      | 66             |
| 75       | 18:10         | 20-07        | 2,0                    | 38                             | 17                    | 962                       | low              | sunny   | 0.800                   | Yes                             | conventional   | Apache      | 400            |
| 78       | 21:00         | 19-07        | 1,0                    | 16                             | 62                    | 962                       | low              | sunny   | 0.362                   | No                              | conventional   | Tommy       | 181            |
| 79       | 11:55         | 21-07        | 2,5                    | 43                             | 18                    | 950                       | low              | sunny   | 0.196                   | Yes                             | conventional   | Manhattan   | 98             |
| 84       | 13:30         | 20-07        | 1,0                    | 52                             | 15                    | 965                       | low              | sunny   | 0.066                   | Yes                             | conventional   | Arina       | 33             |
| 108      | 19:00         | 20-07        | 2,0                    | 33                             | 26                    | 948                       | absent           | sunny   | 0.030                   | Yes                             | conventional   | Galaxy      | 15             |
| 122      | 19:30         | 10-08        | 1,5                    | 21                             | 64                    | 926                       | absent           | sunny   | 0.090                   | Yes                             | conventional   | Arina       | 45             |
| 125      | 10:00         | 22-07        | 0,2                    | 25                             | 60                    | 968                       | absent           | cloudy  | 0.078                   | Yes                             | conventional   | Triticale   | 39             |
| 125      | 10:00         | 22-07        | 0,2                    | 25                             | 60                    | 968                       | absent           | cloudy  | 0.074                   | Yes                             | conventional   | Triticale   | 37             |
| 127      | 13:15         | 01-08        | 1,5                    | 37                             | 23                    | 343                       | middle intensity | sunny   | 0.024                   | Yes                             | conventional   | Zinal       | 12             |
| 128      | 17:25         | 21-07        | 2,5                    | 37                             | 23                    | 944                       | middle intensity | sunny   | 0.046                   | Yes                             | extensive      | Siala       | 23             |
| 139      | 20:00         | 20-07        | 1,5                    | 25                             | 48                    | 960                       | absent           | sunny   | 0.258                   | Yes                             | organic        | Spelt wheat | 129            |
| 140      | 19:00         | 20-07        | 1,5                    | 56                             | 13                    | 965                       | low              | sunny   | 0.136                   | Yes                             | extensive      | Manhattan   | 68             |
| 144      | 13:20         | 20-07        | 2,0                    | 57                             | 12                    | 965                       | absent           | sunny   | 0.096                   | Yes                             | conventional   | Zinal       | 48             |
| 148      | 16:00         | 28-07        | 1,5                    | 23                             | 60                    | 953                       | absent           | cloudy  | 0.108                   | Yes                             | conventional   | Titlis      | 54             |
| 153      | 18:25         | 21-07        | 2,5                    | 34                             | 27                    | 943                       | middle intensity | sunny   | 0.152                   | Yes                             | extensive      | Forel       | 76             |
| 154      | 11:00         | 21-07        | 1,5                    | 42                             | 17                    | 961                       | NA               | sunny   | 0.272                   | Yes                             | organic        | Wiva        | 136            |
| 161      | 16:30         | 01-08        | 1,1                    | 36                             | 33                    | 948                       | middle intensity | sunny   | 0.180                   | Yes                             | conventional   | Levis       | 90             |
| 162      | 14:30         | 28-07        | 1,5                    | 26                             | 44                    | 951                       | low              | cloudy  | 0.104                   | Yes                             | organic        | Wiva        | 52             |
| 163      | 10:00         | 22-07        | 0,2                    | 25                             | 56                    | 968                       | absent           | cloudy  | 0.190                   | Yes                             | conventional   | Mixed       | 95             |
| 163      | 10:00         | 22-07        | 0,2                    | 25                             | 56                    | 968                       | absent           | cloudy  | 0.190                   | Yes                             | conventional   | Mixed       | 95             |
| 167      | 16:59         | 01-08        | 1,5                    | 28                             | 36                    | 932                       | middle intensity | cloudy  | 0.100                   | Yes                             | conventional   | Ludwig      | 50             |
| 168      | 13:45         | 01-08        | 1,5                    | 23                             | 44                    | 937                       | low              | sunny   | 0.110                   | Yes                             | conventional   | Siala       | 55             |
| 169      | 11:65         | 01-08        | 1,5                    | 23                             | 68                    | 960                       | absent           | sunny   | 0.160                   | Yes                             | conventional   | Manhattan   | 80             |
| 182      | 16:15         | 01-08        | 1,5                    | 32                             | 30                    | 939                       | middle intensity | cloudy  | 0.098                   | Yes                             | conventional   | Siala       | 49             |
| 183      | 15:00         | 01-08        | 1,5                    | 37                             | 27                    | 941                       | middle intensity | sunny   | 0.090                   | Yes                             | conventional   | Siala       | 45             |
| 186      | 15:00         | 26-07        | 1,5                    | 28                             | 38                    | 966                       | low              | cloudy  | 0.024                   | Yes                             | conventional   | Combin      | 12             |
| 187      | 15:15         | 26-07        | 1,5                    | 28                             | 38                    | 966                       | low              | cloudy  | 0.024                   | Yes                             | extensive      | Zinal       | 12             |

| Field ID | Sampling hour | Sampling day | Harvester speed (ha/h) | Temperature at soil level (°C) | Relative Humidity (%) | Atmospheric pressure (Pa) | Wind             | Weather | Air volume sampled (m3) | Considered in 454-data analyses | Farming system | Cultivar     | Duration (min) |
|----------|---------------|--------------|------------------------|--------------------------------|-----------------------|---------------------------|------------------|---------|-------------------------|---------------------------------|----------------|--------------|----------------|
| 189      | 15:35         | 26-07        | 1,5                    | 28                             | 38                    | 966                       | low              | cloudy  | 0.022                   | Yes                             | extensive      | Siala        | 11             |
| 190      | 15:45         | 26-07        | 1,5                    | 28                             | 38                    | 966                       | low              | cloudy  | 0.080                   | Yes                             | conventional   | Mixed        | 40             |
| 192      | 11:15         | 28-07        | 1,5                    | 40                             | 33                    | 952                       | low              | cloudy  | 0.060                   | Yes                             | conventional   | Zinal        | 30             |
| 193      | 11:00         | 01-08        | 1,5                    | 35                             | 48                    | 971                       | low              | cloudy  | 0.116                   | Yes                             | organic        | Scaro        | 58             |
| 194      | 14:00         | 26-07        | 1,5                    | 28                             | 38                    | 966                       | low              | cloudy  | 0.036                   | No                              | extensive      | Levis,Combin | 18             |
| 195      | 19:40         | 09-08        | 1,5                    | 24                             | 49                    | 925                       | low              | sunny   | 0.072                   | No                              | conventional   | Claro        | 36             |
| 196      | 17:45         | 01-08        | 1,5                    | 30                             | 36                    | 943                       | low              | cloudy  | 0.084                   | Yes                             | conventional   | Siala        | 42             |
| 203      | 18:30         | 31-07        | 1,5                    | 26                             | 48                    | 967                       | absent           | sunny   | 0.090                   | Yes                             | conventional   | Ludwig       | 45             |
| 204      | 20:00         | 31-07        | 1,5                    | 27                             | 49                    | 959                       | absent           | sunny   | 0.074                   | Yes                             | conventional   | Impression   | 37             |
| 208      | 22:30         | 09-08        | 1,5                    | 17                             | 66                    | 942                       | low              | sunny   | 0.134                   | No                              | extensive      | Titlis       | 67             |
| 209      | 22:00         | 10-08        | 2,5                    | 21                             | 58                    | 928                       | absent           | sunny   | 0.090                   | Yes                             | conventional   | Arina        | 45             |
| 210      | 22:00         | 09-08        | 1,5                    | 19                             | 62                    | 943                       | absent           | sunny   | 0.070                   | No                              | extensive      | Runal        | 35             |
| 211      | 17:10         | 10-08        | 1,0                    | 30                             | 51                    | 927                       | absent           | sunny   | 0.134                   | Yes                             | conventional   | Zinal        | 67             |
| 212      | 17:50         | 01-08        | 1,5                    | 28                             | 47                    | 942                       | low              | cloudy  | 0.044                   | Yes                             | extensive      | Runal        | 22             |
| 213      | 19:30         | 01-08        | 1,5                    | 18                             | 96                    | 937                       | low              | cloudy  | 0.100                   | Yes                             | extensive      | Siala        | 50             |
| 214      | 12:35         | 10-08        | 1,5                    | 38                             | 39                    | 947                       | low              | sunny   | 0.050                   | No                              | organic        | Triticale    | 25             |
| 215      | 14:75         | 10-08        | 1,5                    | 43                             | 25                    | 952                       | low              | sunny   | 0.134                   | No                              | conventional   | Levis        | 67             |
| 220      | 11:30         | 26-07        | 1,5                    | 30                             | 35                    | 967                       | absent           | cloudy  | 0.122                   | Yes                             | conventional   | Soisson      | 61             |
| 226      | 14:15         | 01-08        | 1,5                    | 37                             | 27                    | 941                       | middle intensity | sunny   | 0.136                   | Yes                             | conventional   | Zinal        | 68             |
| 227      | 20:00         | 01-08        | 1,5                    | 19                             | 96                    | 937                       | absent           | cloudy  | 0.024                   | Yes                             | conventional   | ND           | 12             |
| 228      | 02:30         | 01-08        | 1,5                    | 12                             | 83                    | 952                       | absent           | sunny   | 0.200                   | Yes                             | conventional   | Siala        | 100            |
| 229      | 21:00         | 31-07        | 1,5                    | 17                             | 68                    | 952                       | absent           | sunny   | 0.058                   | Yes                             | conventional   | Levis        | 29             |
| 230      | 23:30         | 31-07        | 1,8                    | 18                             | 58                    | 933                       | low              | sunny   | 0.194                   | Yes                             | extensive      | Galaxy       | 97             |
| 231      | 18:10         | 10-08        | 1,0                    | 24                             | 55                    | 926                       | absent           | sunny   | 0.080                   | Yes                             | conventional   | Arina        | 40             |
| 232      | 23:00         | 10-08        | 2,5                    | 19                             | 72                    | 947                       | absent           | sunny   | 0.090                   | No                              | organic        | Wiva         | 45             |
| 233      | 19:15         | 10-08        | 1,5                    | 21                             | 64                    | 926                       | absent           | sunny   | 0.258                   | Yes                             | conventional   | Arina        | 129            |
| 234      | 14:20         | 10-08        | 1,0                    | 21                             | 65                    | 923                       | absent           | sunny   | 0.144                   | Yes                             | organic        | Spelt wheat  | 72             |
| 236      | 14:50         | 10-08        | 3,0                    | 26                             | 56                    | 928                       | absent           | sunny   | 0.144                   | Yes                             | extensive      | Siala        | 72             |

| Field ID | Sampling hour | Sampling day | Harvester speed (ha/h) | Temperature at soil level (°C) | Relative Humidity (%) | Atmospheric pressure (Pa) | Wind             | Weather | Air volume sampled (m3) | Considered in 454-data analyses | Farming system | Cultivar | Duration (min) |
|----------|---------------|--------------|------------------------|--------------------------------|-----------------------|---------------------------|------------------|---------|-------------------------|---------------------------------|----------------|----------|----------------|
| 246      | 15:30         | 01-08        | 1,5                    | 35                             | 27                    | 941                       | middle intensity | sunny   | 0.226                   | Yes                             | extensive      | Forel    | 113            |
| 247      | 16:30         | 10-08        | 1,5                    | 32                             | 41                    | 951                       | absent           | sunny   | 0.172                   | No                              | conventional   | Zinal    | 86             |
| 248      | 19:00         | 10-08        | 1,5                    | 24                             | 55                    | 926                       | absent           | sunny   | 0.090                   | Yes                             | conventional   | Tapidor  | 45             |

**Table S3.** Variables considered in the analysis of fungal alpha and beta diversity

|                                          | Alpha diversity | Beta diversity |
|------------------------------------------|-----------------|----------------|
| Elevation (m)                            | x               | x              |
| <b>Climatic variables</b>                |                 |                |
| Temperature (°C)                         | x               | x              |
| Summer rainfall (mm)                     | x               | x              |
| Annual rainfall (mm)                     | x               | x              |
| Number of freezing days/year             | x               | x              |
| <b>Soil variables</b>                    |                 |                |
| pH                                       | x               | x              |
| N <sub>tot</sub> (mg kg <sup>-1</sup> )  | x               | x              |
| P <sub>tot</sub> (mg kg <sup>-1</sup> )  | x               | x              |
| P <sub>a</sub> (mg kg <sup>-1</sup> )    | x               | x              |
| C <sub>tot</sub> (mg kg <sup>-1</sup> )  | x               | x              |
| C <sub>org</sub> (%)                     | x               | x              |
| CaCO <sub>3</sub> (mg kg <sup>-1</sup> ) | x               | x              |
| Mg (mg kg <sup>-1</sup> )                | x               | x              |
| K (mg kg <sup>-1</sup> )                 | x               | x              |
| <b>Human intervention</b>                |                 |                |
| Farming system                           | x               | x              |
| Wheat cultivar                           |                 | x              |
| Cropping history                         |                 | x              |

**Table S4.** Good's coverage values and sequence data characteristics of samples

| Field ID | Farming system | Wheat variety | Prelevement Type | Nb of reads | Nb of OTUs | Good's coverage |
|----------|----------------|---------------|------------------|-------------|------------|-----------------|
| 11       | conventional   | ND            | Aerosols         | 975         | 43         | 95.59           |
| 12       | conventional   | ND            | Aerosols         | 310         | 17         | 94.52           |
| 12       | conventional   | ND            | Grain            | 696         | 30         | 95.69           |
| 13       | conventional   | Zinal         | Aerosols         | 296         | 15         | 94.93           |
| 13       | conventional   | Zinal         | Grain            | 1222        | 38         | 96.89           |
| 14       | conventional   | Claro         | Aerosols         | 440         | 24         | 94.55           |
| 14       | conventional   | Claro         | Grain            | 702         | 26         | 96.30           |
| 15       | conventional   | Claro         | Aerosols         | 618         | 14         | 97.73           |
| 15       | conventional   | Claro         | Grain            | 1185        | 43         | 96.37           |
| 16       | extensive      | Siala         | Aerosols         | 571         | 21         | 96.32           |
| 16       | extensive      | Siala         | Grain            | 1277        | 44         | 96.55           |
| 17       | extensive      | Siala         | Grain            | 1076        | 41         | 96.19           |
| 19       | organic        | Pollux        | Aerosols         | 501         | 16         | 96.81           |
| 19       | organic        | Pollux        | Grain            | 2012        | 65         | 96.77           |
| 20       | extensive      | Claro         | Aerosols         | 1045        | 53         | 94.93           |
| 20       | extensive      | Claro         | Grain            | 392         | 25         | 93.62           |
| 22       | conventional   | Runal         | Aerosols         | 880         | 22         | 97.50           |
| 22       | conventional   | Runal         | Grain            | 355         | 23         | 93.52           |
| 23       | extensive      | Forel         | Aerosols         | 430         | 21         | 95.12           |
| 24       | conventional   | Ludwig        | Aerosols         | 323         | 14         | 95.67           |
| 24       | conventional   | Ludwig        | Grain            | 544         | 34         | 93.75           |
| 27       | conventional   | ND            | Aerosols         | 586         | 18         | 96.93           |
| 28       | conventional   | Claro         | Aerosols         | 373         | 16         | 95.71           |
| 29       | conventional   | Zinal         | Aerosols         | 521         | 20         | 96.16           |
| 29       | conventional   | Zinal         | Grain            | 584         | 36         | 93.84           |
| 34       | extensive      | Ludwig        | Aerosols         | 505         | 19         | 96.24           |
| 34       | extensive      | Impression    | Grain            | 1057        | 44         | 95.84           |
| 34       | extensive      | Ludwig        | Grain            | 553         | 28         | 94.94           |
| 48       | extensive      | Ludwig        | Grain            | 956         | 32         | 96.65           |
| 62       | conventional   | Levis         | Aerosols         | 396         | 21         | 94.70           |
| 62       | conventional   | Levis         | Grain            | 771         | 27         | 96.50           |
| 63       | conventional   | Zinal         | Aerosols         | 622         | 23         | 96.30           |
| 63       | conventional   | Zinal         | Grain            | 691         | 27         | 96.09           |
| 64       | extensive      | Manhattan     | Aerosols         | 323         | 18         | 94.43           |
| 64       | extensive      | Manhattan     | Grain            | 851         | 29         | 96.59           |
| 65       | organic        | Scaro         | Aerosols         | 306         | 15         | 95.10           |
| 65       | organic        | Scaro         | Grain            | 778         | 33         | 95.76           |
| 67       | conventional   | Combin        | Aerosols         | 1239        | 33         | 97.34           |
| 67       | conventional   | Combin        | Grain            | 671         | 23         | 96.57           |
| 69       | conventional   | Titlis        | Aerosols         | 829         | 29         | 96.50           |
| 69       | conventional   | Titlis        | Grain            | 997         | 42         | 95.79           |
| 70       | extensive      | Runal         | Aerosols         | 876         | 28         | 96.80           |
| 70       | extensive      | Runal         | Grain            | 952         | 34         | 96.43           |
| 71       | organic        | Scaro         | Aerosols         | 880         | 31         | 96.48           |
| 71       | organic        | Scaro         | Grain            | 738         | 35         | 95.26           |
| 72       | conventional   | Triticale     | Aerosols         | 225         | 27         | 88.00           |

| Field ID | Farming system | Wheat variety  | Prelevement Type | Nb of reads | Nb of OTUs | Good's coverage |
|----------|----------------|----------------|------------------|-------------|------------|-----------------|
| 72       | conventional   | Triticale      | Grain            | 724         | 27         | 96.27           |
| 74       | conventional   | Ludwig         | Aerosols         | 245         | 19         | 92.24           |
| 74       | conventional   | Ludwig         | Grain            | 598         | 26         | 95.65           |
| 75       | conventional   | Apache         | Aerosols         | 296         | 19         | 93.58           |
| 75       | conventional   | Apache         | Grain            | 882         | 27         | 96.94           |
| 78       | conventional   | Tommy          | Grain            | 1099        | 28         | 97.45           |
| 79       | conventional   | Manhattan      | Aerosols         | 498         | 18         | 96.39           |
| 79       | conventional   | Manhattan      | Grain            | 882         | 29         | 96.71           |
| 84       | conventional   | Arina          | Aerosols         | 390         | 18         | 95.38           |
| 84       | conventional   | Arina          | Grain            | 775         | 32         | 95.87           |
| 108      | conventional   | Galaxy         | Aerosols         | 186         | 22         | 88.17           |
| 108      | conventional   | Galaxy         | Grain            | 832         | 32         | 96.15           |
| 122      | conventional   | Arina          | Aerosols         | 562         | 27         | 95.20           |
| 125      | conventional   | Triticale      | Aerosols         | 579         | 29         | 94.99           |
| 127      | conventional   | Zinal          | Grain            | 698         | 35         | 94.99           |
| 128      | extensive      | Siala          | Aerosols         | 468         | 29         | 93.80           |
| 128      | extensive      | Siala          | Grain            | 250         | 23         | 90.80           |
| 139      | organic        | Spelt wheat    | Aerosols         | 427         | 19         | 95.55           |
| 139      | organic        | Spelt wheat    | Grain            | 736         | 34         | 95.38           |
| 140      | extensive      | Manhattan      | Aerosols         | 1146        | 36         | 96.86           |
| 140      | extensive      | Manhattan      | Grain            | 733         | 30         | 95.91           |
| 144      | conventional   | Zinal          | Aerosols         | 796         | 26         | 96.73           |
| 144      | conventional   | Zinal          | Grain            | 775         | 32         | 95.87           |
| 148      | conventional   | Titlis         | Aerosols         | 501         | 10         | 98.00           |
| 148      | conventional   | Titlis         | Grain            | 987         | 39         | 96.05           |
| 153      | extensive      | Forel          | Aerosols         | 267         | 17         | 93.63           |
| 153      | extensive      | Forel          | Grain            | 1523        | 45         | 97.05           |
| 154      | organic        | Wiva           | Aerosols         | 614         | 32         | 94.79           |
| 154      | organic        | Wiva           | Grain            | 544         | 26         | 95.22           |
| 161      | conventional   | Levis          | Aerosols         | 592         | 27         | 95.44           |
| 161      | conventional   | Levis          | Grain            | 531         | 22         | 95.86           |
| 162      | organic        | Wiva           | Aerosols         | 389         | 20         | 94.86           |
| 162      | organic        | Wiva           | Grain            | 462         | 27         | 94.16           |
| 163      | conventional   | Mixed varities | Aerosols         | 925         | 33         | 96.43           |
| 163      | conventional   | Mixed varities | Grain            | 1685        | 36         | 97.86           |
| 167      | conventional   | Ludwig         | Aerosols         | 352         | 19         | 94.60           |
| 167      | conventional   | Ludwig         | Grain            | 398         | 20         | 94.97           |
| 168      | conventional   | Siala          | Aerosols         | 305         | 9          | 97.05           |
| 168      | conventional   | Siala          | Grain            | 528         | 27         | 94.89           |
| 169      | conventional   | Manhattan      | Aerosols         | 713         | 25         | 96.49           |
| 169      | conventional   | Manhattan      | Grain            | 1017        | 31         | 96.95           |
| 182      | conventional   | Siala          | Aerosols         | 456         | 14         | 96.93           |
| 182      | conventional   | Siala          | Grain            | 1082        | 38         | 96.49           |
| 183      | conventional   | Siala          | Aerosols         | 319         | 10         | 96.87           |
| 183      | conventional   | Siala          | Grain            | 473         | 31         | 93.45           |
| 186      | conventional   | Combin         | Aerosols         | 480         | 22         | 95.42           |
| 186      | conventional   | Combin, Zinal  | Grain            | 777         | 38         | 95.11           |
| 187      | extensive      | Zinal          | Aerosols         | 395         | 22         | 94.43           |
| 187      | extensive      | Forel, Zinal   | Grain            | 787         | 40         | 94.92           |



| Field ID | Farming system | Wheat variety  | Prelevement Type | Nb of reads | Nb of OTUs | Good's coverage |
|----------|----------------|----------------|------------------|-------------|------------|-----------------|
| 188      | conventional   | Forel          | Aerosols         | 624         | 32         | 94.87           |
| 188      | conventional   | Forel & Siala  | Grain            | 787         | 28         | 96.44           |
| 189      | extensive      | Siala          | Aerosols         | 630         | 31         | 95.08           |
| 189      | extensive      | Siala, Camedo  | Grain            | 823         | 32         | 96.11           |
| 190      | conventional   | Mixed varities | Aerosols         | 457         | 20         | 95.62           |
| 190      | conventional   | Mixed varities | Grain            | 646         | 32         | 95.05           |
| 192      | conventional   | Zinal          | Aerosols         | 431         | 20         | 95.36           |
| 192      | conventional   | Zinal          | Grain            | 501         | 27         | 94.61           |
| 193      | organic        | Scaro          | Aerosols         | 613         | 28         | 95.43           |
| 193      | organic        | Scaro          | Grain            | 620         | 30         | 95.16           |
| 194      | conventional   | Levis, Combin  | Grain            | 973         | 40         | 95.89           |
| 195      | conventional   | Claro          | Grain            | 762         | 29         | 96.19           |
| 196      | conventional   | Siala          | Aerosols         | 664         | 21         | 96.84           |
| 196      | conventional   | Siala          | Grain            | 506         | 30         | 94.07           |
| 203      | conventional   | Ludwig         | Aerosols         | 733         | 37         | 94.95           |
| 203      | conventional   | Ludwig         | Grain            | 623         | 31         | 95.02           |
| 204      | conventional   | Impression     | Aerosols         | 690         | 26         | 96.23           |
| 204      | conventional   | Impression     | Grain            | 607         | 26         | 95.72           |
| 208      | extensive      | Titlis         | Grain            | 512         | 24         | 95.31           |
| 209      | conventional   | Arina          | Aerosols         | 98          | 4          | 95.92           |
| 209      | conventional   | Arina          | Grain            | 601         | 17         | 97.17           |
| 210      | extensive      | Runal          | Grain            | 510         | 19         | 96.27           |
| 211      | conventional   | Zinal          | Aerosols         | 654         | 18         | 97.25           |
| 211      | conventional   | Zinal          | Grain            | 1248        | 40         | 96.79           |
| 212      | extensive      | Runal          | Aerosols         | 1041        | 41         | 96.06           |
| 213      | extensive      | Siala          | Aerosols         | 408         | 18         | 95.59           |
| 213      | extensive      | Siala          | Grain            | 767         | 36         | 95.31           |
| 214      | organic        | Triticale      | Grain            | 735         | 37         | 94.97           |
| 215      | conventional   | Levis          | Grain            | 881         | 33         | 96.25           |
| 220      | conventional   | Soisson        | Aerosols         | 582         | 21         | 96.39           |
| 226      | conventional   | Zinal          | Aerosols         | 616         | 24         | 96.10           |
| 226      | conventional   | Zinal          | Grain            | 704         | 31         | 95.60           |
| 227      | conventional   | ND             | Aerosols         | 869         | 20         | 97.70           |
| 228      | conventional   | Siala          | Aerosols         | 1238        | 33         | 97.33           |
| 229      | conventional   | Levis          | Aerosols         | 751         | 34         | 95.47           |
| 230      | extensive      | Galaxy         | Aerosols         | 886         | 39         | 95.60           |
| 230      | extensive      | Galaxy         | Grain            | 968         | 41         | 95.76           |
| 231      | conventional   | Arina          | Aerosols         | 735         | 21         | 97.14           |
| 231      | conventional   | Arina          | Grain            | 841         | 27         | 96.79           |
| 233      | conventional   | Arina          | Aerosols         | 997         | 30         | 96.99           |
| 233      | conventional   | Arina          | Grain            | 754         | 26         | 96.55           |
| 234      | organic        | Spelt          | Aerosols         | 582         | 23         | 96.05           |
| 236      | extensive      | Siala          | Aerosols         | 551         | 21         | 96.19           |
| 236      | extensive      | Siala          | Grain            | 1054        | 39         | 96.30           |
| 245      | conventional   | Zinal          | Aerosols         | 569         | 31         | 94.55           |
| 245      | conventional   | Zinal          | Grain            | 1043        | 44         | 95.78           |
| 246      | extensive      | Forel          | Aerosols         | 316         | 31         | 90.19           |
| 246      | extensive      | Forel          | Grain            | 845         | 38         | 95.50           |
| 247      | conventional   | Zinal          | Grain            | 956         | 34         | 96.44           |

| <b>Field ID</b> | <b>Farming system</b> | <b>Wheat variety</b> | <b>Prelevement Type</b> | <b>Nb of reads</b> | <b>Nb of OTUs</b> | <b>Good's coverage</b> |
|-----------------|-----------------------|----------------------|-------------------------|--------------------|-------------------|------------------------|
| 248             | conventional          | Tapidor              | Aerosols                | 857                | 19                | 97.78                  |
| 250             | conventional          | Siala                | Grain                   | 790                | 27                | 96.58                  |
| 256             | conventional          | Arina                | Grain                   | 992                | 26                | 97.38                  |
| 257             | extensive             | Levis                | Grain                   | 1204               | 38                | 96.84                  |
| 258             | conventional          | Impression           | Grain                   | 939                | 37                | 96.06                  |
| 260             | conventional          | Zinal                | Grain                   | 2219               | 73                | 96.71                  |
| 261             | conventional          | Impression           | Grain                   | 2215               | 58                | 97.38                  |
| 267             | conventional          | Claro                | Grain                   | 986                | 57                | 94.22                  |
| 271             | conventional          | Runal                | Grain                   | 2012               | 77                | 96.17                  |
| 272             | conventional          | Impression           | Grain                   | 500                | 24                | 95.20                  |
| 273             | conventional          | Manhattan            | Grain                   | 513                | 32                | 93.76                  |
| 274             | conventional          | Claro                | Grain                   | 270                | 18                | 93.33                  |
| 275             | conventional          | Siala                | Grain                   | 650                | 30                | 95.38                  |

**Table S5.** Taxonomic assignment of the OTUs. A putative function is assigned when the OTUs present a sequence identity >96%.

| OTU name                | Genbank accession numbers | Species names with identical hit score                  | % Identity | Final species name           | Taxonomy                                                                                                                                   | Putative functional assignment |
|-------------------------|---------------------------|---------------------------------------------------------|------------|------------------------------|--------------------------------------------------------------------------------------------------------------------------------------------|--------------------------------|
| AirGrainH1ITS_MID_1_002 | KT886526                  | Passalora robiniae                                      | 100%       | Passalora robiniae           | Ascomycota; Pezizomycotina; Dothideomycetes; Dothideomycetidae; Capnodiales; Mycosphaerellaceae; mitosporic Mycosphaerellaceae; Passalora. | phytopathogen                  |
| AirGrainH1ITS_MID_1_004 | KT886527                  | Cladosporium cladosporioides /Cladosporium sp. TMS-2011 | 100%       | Cladosporium cladosporioides | Ascomycota; Pezizomycotina; Dothideomycetes; Dothideomycetidae; Capnodiales; Davidiellaceae; mitosporic Davidiellaceae; Cladosporium.      | phytopathogen                  |
| AirGrainH1ITS_MID_1_005 | KT886528                  | Sclerotinia sclerotiorum                                | 99%        | Sclerotinia sclerotiorum     | Ascomycota; Pezizomycotina; Leotiomyces; Helotiales; Sclerotiniaceae; Sclerotinia.                                                         | phytopathogen                  |
| AirGrainH1ITS_MID_1_006 | KT886529                  | Sporobolomyces roseus                                   | 98%        | Sporobolomyces roseus        | Basidiomycota; Pucciniomycotina; Cystobasidiomycetes; Erythrobasidiales; Erythrobasidiaceae; Sporobolomyces.                               | biocontrol of plant disease    |
| AirGrainH1ITS_MID_1_008 | KT886530                  | Aureobasidium pullulans                                 | 100%       | Aureobasidium pullulans      | Ascomycota; Pezizomycotina; Dothideomycetes; Dothideomycetidae; Dothideales; Dothioraceae; mitosporic Dothioraceae; Aureobasidium.         | Epiphyte                       |
| AirGrainH1ITS_MID_1_009 | KT886531                  | Alternaria ethzedia                                     | 100%       | Alternaria ethzedia          | Ascomycota; Pezizomycotina; Dothideomycetes; Pleosporomycetidae; Pleosporales; Pleosporineae; Pleosporaceae; Lewia.                        | phytopathogen                  |
| AirGrainH1ITS_MID_1_012 | KT886532                  | Epicoccum nigrum                                        | 100%       | Epicoccum nigrum             | Ascomycota; Pezizomycotina; Dothideomycetes; Epicoccum.                                                                                    | phytopathogen                  |

|                            |          |                                                 |      |                         |                                                                                                                                                    |               |
|----------------------------|----------|-------------------------------------------------|------|-------------------------|----------------------------------------------------------------------------------------------------------------------------------------------------|---------------|
| AirGrainHNNH1ITS_MID_1_013 | KT886533 | Gibberella zeae / Fusarium sp. JJP-2009a        | 99%  | Fusarium graminearum    | Ascomycota; Pezizomycotina; Sordariomycetes; Hypocreomycetidae; Hypocreales; mitosporic Hypocreales; Fusarium.                                     | phytopathogen |
| AirGrainHNNH1ITS_MID_1_014 | KT886534 | Alternaria alternata /Alternaria sp. JJP-2009a  | 100% | Alternaria alternata    | Ascomycota; Pezizomycotina; Dothideomycetes; Pleosporomycetidae; Pleosporales; Pleosporineae; Pleosporaceae; mitosporic Pleosporaceae; Alternaria; | phytopathogen |
| AirGrainHNNH1ITS_MID_1_016 | KT886535 | Cryptococcus wieringae                          | 100% | Cryptococcus wieringae  | Basidiomycota; Agaricomycotina; Tremellomycetes; Filobasidiales; mitosporic Filobasidiales;                                                        | saprotroph    |
| AirGrainHNNH1ITS_MID_1_019 | KT886536 | Cryptococcus victoriae                          | 100% | Cryptococcus victoriae  | Basidiomycota; Agaricomycotina; Tremellomycetes; Filobasidiales; mitosporic Filobasidiales;                                                        | saprotroph    |
| AirGrainHNNH1ITS_MID_1_032 | KT886537 | uncultured Cryptococcus /Cryptococcus victoriae | 100% | uncultured Cryptococcus | Basidiomycota; Agaricomycotina; Tremellomycetes; Filobasidiales; mitosporic Filobasidiales;                                                        | saprotroph    |
| AirGrainHNNH1ITS_MID_1_039 | KT886538 | Cryptococcus sp. HB 1222                        | 100% | Cryptococcus sp.        | Basidiomycota; Agaricomycotina; Tremellomycetes; Filobasidiales; mitosporic Filobasidiales;                                                        | saprotroph    |
| AirGrainHNNH1ITS_MID_1_045 | KT886539 | Claviceps purpurea /uncultured Clavicipitaceae  | 99%  | Claviceps purpurea      | Ascomycota; Pezizomycotina; Sordariomycetes; Hypocreomycetidae; Hypocreales; Clavicipitaceae; Claviceps.                                           | phytopathogen |
| AirGrainHNNH1ITS_MID_1_074 | KT886540 | Udeniomyces pannonicus                          | 100% | Udeniomyces pannonicus  | Basidiomycota; Agaricomycotina; Tremellomycetes; Cystofilobasidiales; mitosporic Cystofilobasidiales; Udeniomyces.                                 | saprotroph    |
| AirGrainHNNH1ITS_MID_1_084 | KT886541 | Didymella exitialis                             | 99%  | Didymella exitialis     | Ascomycota; Pezizomycotina; Dothideomycetes; Pleosporomycetidae; Pleosporales; Pleosporineae; Didymellaceae; Didymella.                            | phytopathogen |
| AirGrainHNNH1ITS_MID_1_107 | KT886542 | uncultured fungus                               | 100% | uncultured fungus       |                                                                                                                                                    |               |
| AirGrainHNNH1ITS_MID_1_111 | KT886543 | Dioszegia crocea                                | 99%  | Dioszegia crocea        | Basidiomycota;                                                                                                                                     | saprotroph    |

|                              |          |                                                   |      |                                                   |                                                                                                                                           |               |
|------------------------------|----------|---------------------------------------------------|------|---------------------------------------------------|-------------------------------------------------------------------------------------------------------------------------------------------|---------------|
| AirGrainHNNH1ITS_MID_1_131   | KT886544 | Blumeria graminis                                 | 100% | Blumeria graminis                                 | Agaricomycotina; Tremellomycetes; Tremellales; mitosporic Tremellales; Dioszegia.                                                         | phytopathogen |
| AirGrainHNNH1ITS_MID_1_144   | KT886545 | uncultured fungus                                 | 90%  | uncultured fungus                                 | Ascomycota; Pezizomycotina; Leotiomyces; Erysiphales; Erysiphaceae; Blumeria.                                                             |               |
| AirGrainHNNH1ITS_MID_1_151   | KT886546 | uncultured fungus                                 | 97%  | uncultured fungus                                 |                                                                                                                                           |               |
| AirGrainHNNH1ITS_MID_1_269   | KT886547 | uncultured fungus                                 | 100% | uncultured fungus                                 |                                                                                                                                           |               |
| AirGrainHNNH1ITS_MID_1_278   | KT886548 | Nigrospora oryzae                                 | 100% | Nigrospora oryzae                                 | Ascomycota; Pezizomycotina; Sordariomycetes; Sordariomycetes incertae sedis; Trichosphaeriales; mitosporic Trichosphaeriales; Nigrospora. | saprotroph    |
| AirGrainHNNH1ITS_MID_1_334   | KT886549 | Mycosphaerella graminicola (Zymoseptoria tritici) | 100% | Mycosphaerella graminicola (Zymoseptoria tritici) | Ascomycota; Pezizomycotina; Dothideomycetes; Dothideomycetidae; Capnodiales; Mycosphaerellaceae; Zymoseptoria.                            | phytopathogen |
| AirGrainHNNH1ITS_MID_1_375   | KT886550 | Cryptococcus macerans                             | 99%  | Cryptococcus macerans                             | Basidiomycota; Agaricomycotina; Tremellomycetes; Filobasidiales; mitosporic Filobasidiales;                                               | saprotroph    |
| AirGrainHNNH1ITS_MID_1_480   | KT886551 | uncultured Ascomycota                             | 100% | uncultured Ascomycota                             |                                                                                                                                           |               |
| AirGrainHNNH1ITS_MID_1_497   | KT886552 | Phaeosphaeria nodorum                             | 99%  | Phaeosphaeria nodorum                             | Ascomycota; Pezizomycotina; Dothideomycetes; Pleosporomycetidae; Pleosporales; Pleosporineae; Phaeosphaeriaceae; Phaeosphaeria.           | phytopathogen |
| AirGrainHNNH1ITS_MID_100_002 | KT886553 | Cryptococcus sp. CBS 6984                         | 99%  | Cryptococcus sp.                                  | Basidiomycota; Agaricomycotina; Tremellomycetes; Filobasidiales; mitosporic Filobasidiales;                                               | saprotroph    |
| AirGrainHNNH1ITS_MID_100_085 | KT886554 | Filobasidium floriforme                           | 98%  | Filobasidium floriforme                           | Basidiomycota; Agaricomycotina; Tremellomycetes; Filobasidiales; Filobasidiaceae;                                                         | saprotroph    |

|                           |          |                                              |      |                                           |                                                                                                                                 |               |
|---------------------------|----------|----------------------------------------------|------|-------------------------------------------|---------------------------------------------------------------------------------------------------------------------------------|---------------|
| AirGrainH1ITS_MID_100_112 | KT886555 | uncultured fungus                            | 98%  | uncultured fungus                         | Filobasidium.                                                                                                                   |               |
| AirGrainH1ITS_MID_100_181 | KT886556 | uncultured endophytic fungus                 | 97%  | uncultured fungus                         |                                                                                                                                 |               |
| AirGrainH1ITS_MID_101_012 | KT886557 | Gibberella sp. 1 TMS-2011                    | 100% | Gibberella sp.                            | Ascomycota;<br>Pezizomycotina;Sordariomycetes;<br>Hypocreomycetidae; Hypocreales;<br>Nectriaceae;Gibberella.                    | phytopathogen |
| AirGrainH1ITS_MID_101_019 | KT886558 | Microdochium nivale                          | 100% | Microdochium nivale                       | Ascomycota;<br>Pezizomycotina;Sordariomycetes;<br>Xylariomycetidae; Xylariales; mitosporic<br>Xylariales; Microdochium.         | phytopathogen |
| AirGrainH1ITS_MID_101_075 | KT886559 | Cryptococcus sp. BF108                       | 100% | Cryptococcus sp.                          | Basidiomycota;<br>Agaricomycotina;Tremellomycetes;<br>Filobasidiales; mitosporic Filobasidiales;                                | saprotroph    |
| AirGrainH1ITS_MID_101_093 | KT886560 | uncultured Ascomycota                        | 93%  | uncultured<br>Ascomycota                  |                                                                                                                                 |               |
| AirGrainH1ITS_MID_101_132 | KT886561 | uncultured Didymella<br>/Didymella exitialis | 98%  | uncultured<br>Didymella                   | Ascomycota;<br>Pezizomycotina;Dothideomycetes;<br>Pleosporomycetidae; Pleosporales;<br>Pleosporineae; Didymellaceae; Didymella. |               |
| AirGrainH1ITS_MID_102_017 | KT886562 | Fusarium poae                                | 100% | Fusarium poae                             | Ascomycota;<br>Pezizomycotina;Sordariomycetes;<br>Hypocreomycetidae; Hypocreales;<br>mitosporic Hypocreales; Fusarium.          | phytopathogen |
| AirGrainH1ITS_MID_102_032 | KT886563 | uncultured fungus                            | 98%  | uncultured fungus                         |                                                                                                                                 |               |
| AirGrainH1ITS_MID_102_056 | KT886564 | uncultured Basidiomycota                     | 100% | uncultured<br>Basidiomycota               |                                                                                                                                 |               |
| AirGrainH1ITS_MID_102_057 | KT886565 | Cryptococcus macerans                        | 99%  | Cryptococcus<br>macerans                  | Basidiomycota;<br>Agaricomycotina;Tremellomycetes;<br>Filobasidiales; mitosporic Filobasidiales;                                | saprotroph    |
| AirGrainH1ITS_MID_102_069 | KT886566 | Bulleromyces albus                           | 100% | Bulleromyces albus                        | Basidiomycota;<br>Agaricomycotina;Tremellomycetes;<br>Tremellales; Tremellaceae; Bulleromyces.                                  | saprotroph    |
| AirGrainH1ITS_MID_102_086 | KT886567 | Phaeosphaeria avenaria f. sp.<br>triticae    | 100% | Phaeosphaeria<br>avenaria f. sp. triticae | Ascomycota;<br>Pezizomycotina;Dothideomycetes;                                                                                  | phytopathogen |

|                              |          |                                                             |      |                         |                                                                                                                                                                                                          |                             |
|------------------------------|----------|-------------------------------------------------------------|------|-------------------------|----------------------------------------------------------------------------------------------------------------------------------------------------------------------------------------------------------|-----------------------------|
| AirGrainHNNH1ITS_MID_102_157 | KT886568 | Sporobolomyces ruberrimus var. albus /Sporobolomyces roseus | 100% | Sporobolomyces roseus   | Pleosporomycetidae; Pleosporales; Pleosporineae;Phaeosphaeriaceae; Phaeosphaeria.<br>Basidiomycota;<br>Pucciniomycotina;Cystobasidiomycetes;<br>Erythrobasidiales;<br>Erythrobasidiaceae;Sporobolomyces. | biocontrol of plant disease |
| AirGrainHNNH1ITS_MID_103_004 | KT886569 | Alternaria infectoria                                       | 95%  | Alternaria sp.          | Ascomycota;<br>Pezizomycotina;Dothideomycetes;<br>Pleosporomycetidae; Pleosporales;<br>Pleosporineae;Pleosporaceae; Lewia.                                                                               | phytopathogen               |
| AirGrainHNNH1ITS_MID_103_021 | KT886570 | uncultured fungus                                           | 99%  | uncultured fungus       |                                                                                                                                                                                                          |                             |
| AirGrainHNNH1ITS_MID_103_145 | KT886571 | uncultured fungus                                           | 100% | uncultured fungus       |                                                                                                                                                                                                          |                             |
| AirGrainHNNH1ITS_MID_103_168 | KT886572 | Acremonium sp. BF100                                        | 99%  | Acremonium sp.          | Ascomycota;<br>Pezizomycotina;Sordariomycetes;<br>Hypocreomycetidae; Hypocreales;<br>mitosporic Hypocreales; Acremonium.                                                                                 |                             |
| AirGrainHNNH1ITS_MID_103_194 | KT886573 | uncultured fungus                                           | 100% | uncultured fungus       |                                                                                                                                                                                                          |                             |
| AirGrainHNNH1ITS_MID_103_206 | KT886574 | Cladosporium sp. ascomyc1                                   | 100% | Cladosporium sp.        | Ascomycota;<br>Pezizomycotina;Dothideomycetes;<br>Dothideomycetidae; Capnodiales;<br>Davidiellaceae; mitosporic Davidiellaceae;<br>Cladosporium.                                                         | phytopathogen               |
| AirGrainHNNH1ITS_MID_103_246 | KT886575 | uncultured Cryptococcus                                     | 97%  | uncultured Cryptococcus | Basidiomycota;<br>Agaricomycotina;Tremellomycetes;<br>Filobasidiales; mitosporic Filobasidiales;                                                                                                         |                             |
| AirGrainHNNH1ITS_MID_104_065 | KT886576 | Dioszegia hungarica                                         | 93%  | Dioszegia sp.           | Basidiomycota;<br>Agaricomycotina;Tremellomycetes;<br>Tremellales; mitosporic Tremellales;<br>Dioszegia.                                                                                                 | saprotroph                  |
| AirGrainHNNH1ITS_MID_104_088 | KT886577 | Phoma herbarum                                              | 99%  | Phoma herbarum          | Ascomycota;<br>Pezizomycotina;Dothideomycetes;<br>Pleosporomycetidae; Pleosporales;<br>Pleosporineae;Didymellaceae;<br>Peyronellaea.                                                                     | saprotroph                  |

|                              |          |                                                                            |      |                            |                                                                                                                                      |               |
|------------------------------|----------|----------------------------------------------------------------------------|------|----------------------------|--------------------------------------------------------------------------------------------------------------------------------------|---------------|
| AirGrainHNNH1ITS_MID_104_169 | KT886578 | uncultured fungus                                                          | 96%  | uncultured fungus          |                                                                                                                                      |               |
| AirGrainHNNH1ITS_MID_104_175 | KT886579 | uncultured fungus                                                          | 97%  | uncultured fungus          |                                                                                                                                      |               |
| AirGrainHNNH1ITS_MID_104_180 | KT886580 | Cryptococcus ater                                                          | 100% | Cryptococcus ater          | Basidiomycota;<br>Agaricomycotina;Tremellomycetes;<br>Filobasidiales; mitosporic Filobasidiales;                                     | saprotroph    |
| AirGrainHNNH1ITS_MID_104_215 | KT886581 | uncultured fungus                                                          | 98%  | uncultured fungus          |                                                                                                                                      |               |
| AirGrainHNNH1ITS_MID_105_116 | KT886582 | Epicoccum nigrum                                                           | 100% | Epicoccum nigrum           | Ascomycota;<br>Pezizomycotina;Dothideomycetes;<br>Epicoccum.                                                                         | phytopathogen |
| AirGrainHNNH1ITS_MID_105_194 | KT886583 | Cryptococcus oeirensis                                                     | 100% | Cryptococcus<br>oeirensis  | Basidiomycota;<br>Agaricomycotina;Tremellomycetes;<br>Filobasidiales; mitosporic Filobasidiales;                                     | saprotroph    |
| AirGrainHNNH1ITS_MID_105_239 | KT886584 | Peyronellaea pinodella<br>(Phoma pinodella)<br>/Microsphaeropsis amaranthi | 100% | Peyronellaea<br>pinodella  | Ascomycota;<br>Pezizomycotina;Dothideomycetes;<br>Pleosporomycetidae; Pleosporales;<br>Pleosporineae;Didymellaceae;<br>Peyronellaea. | phytopathogen |
| AirGrainHNNH1ITS_MID_106_004 | KT886585 | uncultured fungus                                                          | 91%  | uncultured fungus          |                                                                                                                                      |               |
| AirGrainHNNH1ITS_MID_106_012 | KT886586 | fungal sp. FL-2010d                                                        | 100% | uncultured fungus          |                                                                                                                                      |               |
| AirGrainHNNH1ITS_MID_106_115 | KT886587 | Dioszegia fristingensis                                                    | 100% | Dioszegia<br>fristingensis | Basidiomycota;<br>Agaricomycotina;Tremellomycetes;<br>Tremellales; mitosporic Tremellales;<br>Dioszegia.                             | saprotroph    |
| AirGrainHNNH1ITS_MID_107_037 | KT886588 | uncultured Ascomycota                                                      | 92%  | uncultured<br>Ascomycota   |                                                                                                                                      |               |
| AirGrainHNNH1ITS_MID_108_159 | KT886589 | uncultured fungus                                                          | 100% | uncultured fungus          |                                                                                                                                      |               |
| AirGrainHNNH1ITS_MID_109_036 | KT886590 | uncultured Cryptococcus                                                    | 97%  | uncultured<br>Cryptococcus | Basidiomycota;<br>Agaricomycotina;Tremellomycetes;<br>Filobasidiales; mitosporic Filobasidiales;                                     |               |
| AirGrainHNNH1ITS_MID_109_094 | KT886591 | uncultured Cryptococcus                                                    | 100% | uncultured<br>Cryptococcus | Basidiomycota;<br>Agaricomycotina;Tremellomycetes;<br>Filobasidiales; mitosporic Filobasidiales;                                     |               |
| AirGrainHNNH1ITS_MID_110_011 | KT886592 | Bullera globispora                                                         | 100% | Bullera globispora         | Basidiomycota;<br>Agaricomycotina;Tremellomycetes;<br>Tremellales; mitosporic Tremellales;                                           | saprotroph    |



|                           |          |                                                      |      |                            |                                                                                                                                                              |               |
|---------------------------|----------|------------------------------------------------------|------|----------------------------|--------------------------------------------------------------------------------------------------------------------------------------------------------------|---------------|
| AirGrainH1ITS_MID_110_165 | KT886593 | Pyrenophora teres                                    | 96%  | Pyrenophora sp.            | Bullera.<br>Ascomycota;<br>Pezizomycotina;Dothideomycetes;<br>Pleosporomycetidae; Pleosporales;<br>Pleosporineae;Pleosporaceae;<br>Pyrenophora.              | phytopathogen |
| AirGrainH1ITS_MID_113_031 | KT886594 | uncultured fungus                                    | 99%  | uncultured fungus          |                                                                                                                                                              |               |
| AirGrainH1ITS_MID_114_047 | KT886595 | uncultured fungus                                    | 100% | uncultured fungus          |                                                                                                                                                              |               |
| AirGrainH1ITS_MID_114_078 | KT886596 | Alternaria brassicae                                 | 100% | Alternaria brassicae       | Ascomycota;<br>Pezizomycotina;Dothideomycetes;<br>Pleosporomycetidae; Pleosporales;<br>Pleosporineae;Pleosporaceae; mitosporic<br>Pleosporaceae; Alternaria; | phytopathogen |
| AirGrainH1ITS_MID_114_202 | KT886597 | Alternaria conjuncta                                 | 96%  | Alternaria sp.             | Ascomycota;<br>Pezizomycotina;Dothideomycetes;<br>Pleosporomycetidae; Pleosporales;<br>Pleosporineae;Pleosporaceae; mitosporic<br>Pleosporaceae; Alternaria; | phytopathogen |
| AirGrainH1ITS_MID_115_060 | KT886598 | Cryptococcus sp. HB 1222                             | 97%  | Cryptococcus sp.           | Basidiomycota;<br>Agaricomycotina;Tremellomycetes;<br>Filobasidiales; mitosporic Filobasidiales;                                                             | saprotroph    |
| AirGrainH1ITS_MID_115_224 | KT886599 | Fusarium pulverosum                                  | 98%  | Fusarium<br>pulverosum     | Ascomycota;<br>Pezizomycotina;Sordariomycetes;<br>Hypocreomycetidae; Hypocreales;<br>mitosporic Hypocreales; Fusarium.                                       | phytopathogen |
| AirGrainH1ITS_MID_115_226 | KT886600 | uncultured endophytic fungus<br>/fungal sp. FL-2010d | 96%  | uncultured fungus          |                                                                                                                                                              |               |
| AirGrainH1ITS_MID_116_024 | KT886601 | uncultured fungus                                    | 97%  | uncultured fungus          |                                                                                                                                                              |               |
| AirGrainH1ITS_MID_117_128 | KT886602 | uncultured Cryptococcus<br>/Cryptococcus victoriae   | 98%  | uncultured<br>Cryptococcus | Basidiomycota;<br>Agaricomycotina;Tremellomycetes;<br>Filobasidiales; mitosporic Filobasidiales;                                                             |               |
| AirGrainH1ITS_MID_118_076 | KT886603 | Alternaria infectoria                                | 98%  | Alternaria infectoria      | Ascomycota;<br>Pezizomycotina;Dothideomycetes;<br>Pleosporomycetidae; Pleosporales;<br>Pleosporineae;Pleosporaceae; Lewia.                                   | phytopathogen |

|                             |          |                           |      |                          |                                                                                                                                 |                 |
|-----------------------------|----------|---------------------------|------|--------------------------|---------------------------------------------------------------------------------------------------------------------------------|-----------------|
| AirGrainHNH1ITS_MID_120_249 | KT886604 | uncultured Cryptococcus   | 100% | uncultured Cryptococcus  | Basidiomycota; Agaricomycotina; Tremellomycetes; Filobasidiales; mitosporic Filobasidiales;                                     |                 |
| AirGrainHNH1ITS_MID_121_010 | KT886605 | Leptosphaerulina sp. BF19 | 99%  | Leptosphaerulina sp.     | Ascomycota; Pezizomycotina; Dothideomycetes; Pleosporomycetidae; Pleosporales; Pleosporineae; Didymellaceae; Leptosphaerulina.  |                 |
| AirGrainHNH1ITS_MID_121_039 | KT886606 | Choiromyces venosus       | 99%  | Choiromyces venosus      | Ascomycota; Pezizomycotina; Pezizomycetes; Pezizales; Tuberales; Choiromyces.                                                   | Ectomycorrhizal |
| AirGrainHNH1ITS_MID_121_115 | KT886607 | Microdochium sp. 00019    | 100% | Microdochium sp.         | Ascomycota; Pezizomycotina; Sordariomycetes; Xylariomycetidae; Xylariales; mitosporic Xylariales; Microdochium.                 | phytopathogen   |
| AirGrainHNH1ITS_MID_122_011 | KT886608 | Sporidiobolus pararoseus  | 98%  | Sporidiobolus pararoseus | Basidiomycota; Pucciniomycotina; Microbotryomycetes; Sporidiobolales; Sporidiobolus.                                            | saprotroph      |
| AirGrainHNH1ITS_MID_122_164 | KT886609 | Phaeosphaeria nodorum     | 98%  | Phaeosphaeria nodorum    | Ascomycota; Pezizomycotina; Dothideomycetes; Pleosporomycetidae; Pleosporales; Pleosporineae; Phaeosphaeriaceae; Phaeosphaeria. | phytopathogen   |
| AirGrainHNH1ITS_MID_122_185 | KT886610 | uncultured Cryptococcus   | 97%  | uncultured Cryptococcus  | Basidiomycota; Agaricomycotina; Tremellomycetes; Filobasidiales; mitosporic Filobasidiales;                                     |                 |
| AirGrainHNH1ITS_MID_122_261 | KT886611 | Alternaria infectoria     | 97%  | Alternaria infectoria    | Ascomycota; Pezizomycotina; Dothideomycetes; Pleosporomycetidae; Pleosporales; Pleosporineae; Pleosporaceae; Lewia.             | phytopathogen   |
| AirGrainHNH1ITS_MID_123_028 | KT886612 | uncultured fungus         | 97%  | uncultured fungus        |                                                                                                                                 |                 |
| AirGrainHNH1ITS_MID_123_030 | KT886613 | Alternaria conjuncta      | 96%  | Alternaria sp.           | Ascomycota; Pezizomycotina; Dothideomycetes; Pleosporomycetidae; Pleosporales; Pleosporineae; Pleosporaceae; mitosporic         | phytopathogen   |

|                              |          |                                                |      |                            |                                                                                                                                 |               |
|------------------------------|----------|------------------------------------------------|------|----------------------------|---------------------------------------------------------------------------------------------------------------------------------|---------------|
| AirGrainHNNH1ITS_MID_123_032 | KT886614 | uncultured fungus                              | 98%  | uncultured fungus          | Pleosporaceae; Alternaria;                                                                                                      |               |
| AirGrainHNNH1ITS_MID_123_218 | KT886615 | uncultured fungus                              | 98%  | uncultured fungus          |                                                                                                                                 |               |
| AirGrainHNNH1ITS_MID_123_286 | KT886616 | uncultured fungus                              | 97%  | uncultured fungus          |                                                                                                                                 |               |
| AirGrainHNNH1ITS_MID_123_288 | KT886617 | uncultured fungus                              | 100% | uncultured fungus          |                                                                                                                                 |               |
| AirGrainHNNH1ITS_MID_124_209 | KT886618 | Alternaria infectoria                          | 92%  | Alternaria sp.             | Ascomycota;<br>Pezizomycotina;Dothideomycetes;<br>Pleosporomycetidae; Pleosporales;<br>Pleosporineae;Pleosporaceae; Lewia.      | phytopathogen |
| AirGrainHNNH1ITS_MID_127_066 | KT886619 | Microdochium nivale<br>/Microdochium sp. 00019 | 100% | Microdochium nivale        | Ascomycota;<br>Pezizomycotina;Sordariomycetes;<br>Xylariomycetidae; Xylariales; mitosporic<br>Xylariales; Microdochium.         | phytopathogen |
| AirGrainHNNH1ITS_MID_127_185 | KT886620 | uncultured soil fungus                         | 91%  | uncultured fungus          |                                                                                                                                 |               |
| AirGrainHNNH1ITS_MID_127_230 | KT886621 | uncultured fungus                              | 97%  | uncultured fungus          |                                                                                                                                 |               |
| AirGrainHNNH1ITS_MID_128_050 | KT886622 | Cryptococcus victoriae                         | 96%  | Cryptococcus sp.           | Basidiomycota;<br>Agaricomycotina;Tremellomycetes;<br>Filobasidiales; mitosporic Filobasidiales;                                | saprotroph    |
| AirGrainHNNH1ITS_MID_128_146 | KT886623 | Pleospora herbarum                             | 100% | Pleospora herbarum         | Ascomycota;<br>Pezizomycotina;Dothideomycetes;<br>Pleosporomycetidae; Pleosporales;<br>Pleosporineae; Pleosporaceae; Pleospora. | phytopathogen |
| AirGrainHNNH1ITS_MID_132_023 | KT886624 | Cryptococcus carnescens                        | 100% | Cryptococcus<br>carnescens | Basidiomycota;<br>Agaricomycotina;Tremellomycetes;<br>Filobasidiales; mitosporic Filobasidiales;                                | saprotroph    |
| AirGrainHNNH1ITS_MID_132_178 | KT886625 | Alternaria infectoria                          | 97%  | Alternaria infectoria      | Ascomycota;<br>Pezizomycotina;Dothideomycetes;<br>Pleosporomycetidae; Pleosporales;<br>Pleosporineae;Pleosporaceae; Lewia.      | phytopathogen |
| AirGrainHNNH1ITS_MID_135_048 | KT886626 | uncultured endophytic fungus                   | 100% | uncultured fungus          |                                                                                                                                 |               |
| AirGrainHNNH1ITS_MID_136_021 | KT886627 | uncultured soil fungus                         | 100% | uncultured fungus          |                                                                                                                                 |               |
| AirGrainHNNH1ITS_MID_136_214 | KT886628 | Acremonium sp. SS-1449<br>AM262391.1           | 98%  | Acremonium sp.             | Ascomycota;<br>Pezizomycotina;Sordariomycetes;<br>Hypocreomycetidae; Hypocreales;                                               |               |

|                           |          |                                                                   |      |                             |                                                                                                                            |                                |
|---------------------------|----------|-------------------------------------------------------------------|------|-----------------------------|----------------------------------------------------------------------------------------------------------------------------|--------------------------------|
| AirGrainH1ITS_MID_136_224 | KT886629 | Sporidiobolus sp. CBS 5541                                        | 99%  | Sporidiobolus sp.           | mitosporic Hypocreales; Acremonium.<br>Basidiomycota;                                                                      | saprotroph                     |
| AirGrainH1ITS_MID_136_233 | KT886630 | Cryptococcus flavescens                                           | 100% | Cryptococcus<br>flavescens  | Pucciniomycotina;Microbotryomycetes;<br>Sporidiobolales; Sporidiobolus.<br>Basidiomycota;                                  | saprotroph                     |
| AirGrainH1ITS_MID_137_049 | KT886631 | uncultured Basidiomycota                                          | 98%  | uncultured<br>Basidiomycota | Agaricomycotina;Tremellomycetes;<br>Filobasidiales; mitosporic Filobasidiales;                                             |                                |
| AirGrainH1ITS_MID_139_191 | KT886632 | Alternaria ethzedia                                               | 98%  | Alternaria ethzedia         | Ascomycota;                                                                                                                | phytopathogen                  |
| AirGrainH1ITS_MID_141_138 | KT886633 | Alternaria ethzedia                                               | 96%  | Alternaria sp.              | Pezizomycotina;Dothideomycetes;<br>Pleosporomycetidae; Pleosporales;<br>Pleosporineae;Pleosporaceae; Lewia.<br>Ascomycota; | phytopathogen                  |
| AirGrainH1ITS_MID_141_178 | KT886634 | uncultured fungus                                                 | 99%  | uncultured fungus           | Pezizomycotina;Dothideomycetes;<br>Pleosporomycetidae; Pleosporales;<br>Pleosporineae;Pleosporaceae; Lewia.                |                                |
| AirGrainH1ITS_MID_142_024 | KT886635 | Sporobolomyces coprosmae                                          | 95%  | Sporobolomyces sp.          | Basidiomycota;                                                                                                             | biocontrol of<br>plant disease |
| AirGrainH1ITS_MID_142_212 | KT886636 | uncultured Ascomycota                                             | 96%  | uncultured<br>Ascomycota    | Pucciniomycotina;Cystobasidiomycetes;<br>Erythrobasidiales;<br>Erythrobasidiaceae;Sporobolomyces.                          |                                |
| AirGrainH1ITS_MID_142_289 | KT886637 | Sporobolomyces roseus<br>/Sporobolomyces ruberrimus<br>var. albus | 99%  | Sporobolomyces<br>roseus    | Basidiomycota;                                                                                                             | biocontrol of<br>plant disease |
| AirGrainH1ITS_MID_143_009 | KT886638 | Capronia semiimmersa<br>(Phialophora americana)                   | 100% | Capronia<br>semiimmersa     | Pucciniomycotina;Cystobasidiomycetes;<br>Erythrobasidiales;<br>Erythrobasidiaceae;Sporobolomyces.<br>Ascomycota;           | saprotroph                     |
| AirGrainH1ITS_MID_143_018 | KT886639 | Eurotium amstelodami                                              | 99%  | Eurotium<br>amstelodami     | Pezizomycotina;Eurotiomycetes;<br>Capronia.<br>Ascomycota;                                                                 | Human<br>pathogen              |

|                              |          |                                                   |      |                        |                                                                                                                                           |               |
|------------------------------|----------|---------------------------------------------------|------|------------------------|-------------------------------------------------------------------------------------------------------------------------------------------|---------------|
| AirGrainHNNH1ITS_MID_143_084 | KT886640 | uncultured fungus                                 | 97%  | uncultured fungus      | Eurotiomycetidae; Eurotiales; Trichocomaceae; Eurotium.                                                                                   |               |
| AirGrainHNNH1ITS_MID_143_185 | KT886641 | Ramularia collo-cygni                             | 99%  | Ramularia collo-cygni  | Ascomycota; Pezizomycotina;Dothideomycetes; Dothideomycetidae; Capnodiales; Mycosphaerellaceae; mitosporic Mycosphaerellaceae; Ramularia. | phytopathogen |
| AirGrainHNNH1ITS_MID_144_017 | KT886642 | uncultured fungus                                 | 96%  | uncultured fungus      |                                                                                                                                           |               |
| AirGrainHNNH1ITS_MID_145_019 | KT886643 | uncultured fungus                                 | 96%  | uncultured fungus      |                                                                                                                                           |               |
| AirGrainHNNH1ITS_MID_145_067 | KT886644 | Epicoccum nigrum                                  | 99%  | Epicoccum nigrum       | Ascomycota; Pezizomycotina;Dothideomycetes; Epicoccum.                                                                                    | phytopathogen |
| AirGrainHNNH1ITS_MID_145_201 | KT886645 | Pleospora herbarum                                | 94%  | Pleospora herbarum     | Ascomycota; Pezizomycotina;Dothideomycetes; Pleosporomycetidae; Pleosporales; Pleosporineae; Pleosporaceae; Pleospora.                    | phytopathogen |
| AirGrainHNNH1ITS_MID_145_270 | KT886646 | uncultured fungus                                 | 97%  | uncultured fungus      |                                                                                                                                           |               |
| AirGrainHNNH1ITS_MID_147_017 | KT886647 | Passalora robiniae                                | 99%  | Passalora robiniae     | Ascomycota; Pezizomycotina;Dothideomycetes; Dothideomycetidae; Capnodiales;Mycosphaerellaceae; mitosporic Mycosphaerellaceae; Passalora.  | phytopathogen |
| AirGrainHNNH1ITS_MID_147_433 | KT886648 | uncultured fungus                                 | 100% | uncultured fungus      |                                                                                                                                           |               |
| AirGrainHNNH1ITS_MID_147_516 | KT886649 | uncultured fungus                                 | 100% | uncultured fungus      |                                                                                                                                           |               |
| AirGrainHNNH1ITS_MID_148_046 | KT886650 | uncultured fungus                                 | 98%  | uncultured fungus      |                                                                                                                                           |               |
| AirGrainHNNH1ITS_MID_148_226 | KT886651 | Cryptococcus foliicola                            | 100% | Cryptococcus foliicola | Basidiomycota; Agaricomycotina;Tremellomycetes; Filobasidiales; mitosporic Filobasidiales;                                                | saprotroph    |
| AirGrainHNNH1ITS_MID_148_254 | KT886652 | Cryptococcus heimaeyensis /Cryptococcus foliicola | 94%  | Cryptococcus sp.       | Basidiomycota; Agaricomycotina;Tremellomycetes; Filobasidiales; mitosporic Filobasidiales;                                                | saprotroph    |
| AirGrainHNNH1ITS_MID_148_311 | KT886653 | uncultured fungus                                 | 99%  | uncultured fungus      |                                                                                                                                           |               |
| AirGrainHNNH1ITS_MID_150_109 | KT886654 | Phaeosphaeria nodorum                             | 96%  | Phaeosphaeria sp.      | Ascomycota; Pezizomycotina;Dothideomycetes;                                                                                               | phytopathogen |

|                              |          |                                              |     |                           |                                                                                                                                                             |                             |
|------------------------------|----------|----------------------------------------------|-----|---------------------------|-------------------------------------------------------------------------------------------------------------------------------------------------------------|-----------------------------|
| AirGrainHNNH1ITS_MID_150_301 | KT886655 | uncultured fungus                            | 98% | uncultured fungus         | Pleosporomycetidae; Pleosporales; Pleosporineae; Phaeosphaeriaceae; Phaeosphaeria.                                                                          |                             |
| AirGrainHNNH1ITS_MID_151_028 | KT886656 | Erysiphe betae                               | 96% | Erysiphe sp.              | Ascomycota; Pezizomycotina; Leotiomyces; Erysiphales; Erysiphaceae; Erysiphe.                                                                               | phytopathogen               |
| AirGrainHNNH1ITS_MID_151_121 | KT886657 | Ampelomyces sp. B2                           | 98% | Ampelomyces sp.           | Ascomycota; Pezizomycotina; Dothideomycetes; Pleosporomycetidae; Pleosporales; Pleosporineae; Leptosphaeriaceae; mitosporic Leptosphaeriaceae; Ampelomyces. | phytopathogen               |
| AirGrainHNNH1ITS_MID_151_161 | KT886658 | uncultured Cryptococcus                      | 98% | uncultured Cryptococcus   | Basidiomycota; Agaricomycotina; Tremellomycetes; Filobasidiales; mitosporic Filobasidiales;                                                                 |                             |
| AirGrainHNNH1ITS_MID_151_186 | KT886659 | Sporobolomyces roseus                        | 97% | Sporobolomyces roseus     | Basidiomycota; Pucciniomycotina; Cystobasidiomycetes; Erythrobasidiales; Erythrobasidiaceae; Sporobolomyces.                                                | biocontrol of plant disease |
| AirGrainHNNH1ITS_MID_151_226 | KT886660 | uncultured fungus                            | 95% | uncultured fungus         |                                                                                                                                                             |                             |
| AirGrainHNNH1ITS_MID_151_385 | KT886661 | Chalastospora ellipsoidea                    | 98% | Chalastospora ellipsoidea | Ascomycota; Pezizomycotina; Dothideomycetes; Pleosporomycetidae; Pleosporales; Pleosporineae; Pleosporaceae; mitosporic Pleosporales; Chalastospora.        |                             |
| AirGrainHNNH1ITS_MID_151_436 | KT886662 | Ulocladium sp. VL204 /Ulocladium consortiale | 98% | Ulocladium consortiale    | Ascomycota; Pezizomycotina; Dothideomycetes; Pleosporomycetidae; Pleosporales; Pleosporineae; Pleosporaceae; mitosporic Pleosporaceae; Ulocladium.          |                             |
| AirGrainHNNH1ITS_MID_151_490 | KT886663 | Taphrina padi                                | 99% | Taphrina padi             | Ascomycota; Taphrinomycotina; Taphrinomycetes; Taphrinales; Taphrinaceae; Taphrina.                                                                         | phytopathogen               |
| AirGrainHNNH1ITS_MID_153_116 | KT886664 | Lewia infectoria                             | 93% | Lewia sp.                 | Ascomycota;                                                                                                                                                 | phytopathogen               |

|                             |          |                                              |      |                         |                                                                                                                                        |               |
|-----------------------------|----------|----------------------------------------------|------|-------------------------|----------------------------------------------------------------------------------------------------------------------------------------|---------------|
| AirGrainHNNH1ITS_MID_16_073 | KT886665 | uncultured Ascomycota sp. I391               | 96%  | uncultured Ascomycota   | Pezizomycotina;Dothideomycetes; Pleosporomycetidae; Pleosporales; Pleosporineae; Pleosporaceae;mitosporic Pleosporales; Chalastospora. |               |
| AirGrainHNNH1ITS_MID_17_125 | KT886666 | uncultured fungus                            | 100% | uncultured fungus       |                                                                                                                                        |               |
| AirGrainHNNH1ITS_MID_18_111 | KT886667 | Fusarium poae                                | 95%  | Fusarium sp.            | Ascomycota; Pezizomycotina;Sordariomycetes; Hypocreomycetidae; Hypocreales; mitosporic Hypocreales; Fusarium.                          | phytopathogen |
| AirGrainHNNH1ITS_MID_2_039  | KT886668 | uncultured fungal sp. D9                     | 100% | uncultured fungus       |                                                                                                                                        |               |
| AirGrainHNNH1ITS_MID_2_099  | KT886669 | Microbotryum duriaeanum (Ustilago duriaeana) | 99%  | Microbotryum duriaeanum | Basidiomycota; Pucciniomycotina; Microbotryomycetes; Microbotryales; Microbotryaceae; Microbotryum.                                    | saprotroph    |
| AirGrainHNNH1ITS_MID_2_228  | KT886670 | Alternaria ethzedia                          | 97%  | Alternaria ethzedia     | Ascomycota; Pezizomycotina;Dothideomycetes; Pleosporomycetidae; Pleosporales; Pleosporineae;Pleosporaceae; Lewia.                      | phytopathogen |
| AirGrainHNNH1ITS_MID_22_058 | KT886671 | Cryptococcus victoriae                       | 100% | Cryptococcus victoriae  | Basidiomycota; Agaricomycotina;Tremellomycetes; Filobasidiales; mitosporic Filobasidiales;                                             | saprotroph    |
| AirGrainHNNH1ITS_MID_22_095 | KT886672 | Microdochium bolleyi                         | 100% | Microdochium bolleyi    | Ascomycota; Pezizomycotina;Sordariomycetes; Xylariomycetidae; Xylariales; mitosporic Xylariales; Microdochium.                         | phytopathogen |
| AirGrainHNNH1ITS_MID_26_058 | KT886673 | uncultured fungus                            | 100% | uncultured fungus       |                                                                                                                                        |               |
| AirGrainHNNH1ITS_MID_26_144 | KT886674 | Dioszegia butyracea                          | 99%  | Dioszegia butyracea     | Basidiomycota; Agaricomycotina;Tremellomycetes; Tremellales; mitosporic Tremellales; Dioszegia.                                        | phytopathogen |
| AirGrainHNNH1ITS_MID_29_099 | KT886675 | Cryptococcus victoriae                       | 98%  | Cryptococcus victoriae  | Basidiomycota; Agaricomycotina;Tremellomycetes; Filobasidiales; mitosporic Filobasidiales;                                             | saprotroph    |
| AirGrainHNNH1ITS_MID_30_068 | KT886676 | uncultured fungus                            |      | uncultured fungus       |                                                                                                                                        |               |

|                             |          |                                                              |      |                                |                                                                                                                                                              |                                |
|-----------------------------|----------|--------------------------------------------------------------|------|--------------------------------|--------------------------------------------------------------------------------------------------------------------------------------------------------------|--------------------------------|
| AirGrainHNNH1ITS_MID_30_136 | KT886677 | uncultured fungus                                            |      | uncultured fungus              |                                                                                                                                                              |                                |
| AirGrainHNNH1ITS_MID_32_116 | KT886678 | Alternaria ethzedia                                          | 96%  | Alternaria sp.                 | Ascomycota;<br>Pezizomycotina;Dothideomycetes;<br>Pleosporomycetidae; Pleosporales;<br>Pleosporineae;Pleosporaceae; Lewia.                                   | phytopathogen                  |
| AirGrainHNNH1ITS_MID_32_319 | KT886679 | uncultured fungus                                            |      | uncultured fungus              |                                                                                                                                                              |                                |
| AirGrainHNNH1ITS_MID_33_169 | KT886680 | Udeniomyces pyricola                                         | 99%  | Udeniomyces<br>pyricola        | Basidiomycota;<br>Agaricomycotina;Tremellomycetes;<br>Cystofilobasidiales; mitosporic<br>Cystofilobasidiales; Udeniomyces.                                   | saprotroph                     |
| AirGrainHNNH1ITS_MID_33_177 | KT886681 | uncultured soil fungus                                       |      | uncultured fungus              |                                                                                                                                                              |                                |
| AirGrainHNNH1ITS_MID_34_031 | KT886682 | uncultured Cryptococcus                                      |      | uncultured<br>Cryptococcus     | Basidiomycota;<br>Agaricomycotina;Tremellomycetes;<br>Filobasidiales; mitosporic Filobasidiales;                                                             |                                |
| AirGrainHNNH1ITS_MID_34_112 | KT886683 | uncultured fungus                                            |      | uncultured fungus              |                                                                                                                                                              |                                |
| AirGrainHNNH1ITS_MID_34_149 | KT886684 | Mycosphaerella fragariae                                     | 99%  | Mycosphaerella<br>fragariae    | Ascomycota;<br>Pezizomycotina;Dothideomycetes;<br>Dothideomycetidae; Capnodiales;<br>Mycosphaerellaceae; mitosporic<br>Mycosphaerellaceae; Ramularia.        | phytopathogen                  |
| AirGrainHNNH1ITS_MID_35_075 | KT886685 | uncultured fungus                                            |      | uncultured fungus              |                                                                                                                                                              |                                |
| AirGrainHNNH1ITS_MID_35_129 | KT886686 | Alternaria conjuncta /Lewia<br>ethzedia/Alternaria sp. B28B/ | 100% | Alternaria conjuncta           | Ascomycota;<br>Pezizomycotina;Dothideomycetes;<br>Pleosporomycetidae; Pleosporales;<br>Pleosporineae;Pleosporaceae; mitosporic<br>Pleosporaceae; Alternaria; | phytopathogen                  |
| AirGrainHNNH1ITS_MID_35_282 | KT886687 | Plectosphaerella cucumerina                                  | 100% | Plectosphaerella<br>cucumerina | Ascomycota;<br>Pezizomycotina;Sordariomycetes;<br>Hypocreomycetidae; Glomerellales;<br>Plectosphaerellaceae; Plectosphaerella.                               | phytopathogen                  |
| AirGrainHNNH1ITS_MID_36_097 | KT886688 | uncultured soil fungus                                       |      | uncultured fungus              |                                                                                                                                                              |                                |
| AirGrainHNNH1ITS_MID_36_219 | KT886689 | Sporobolomyces coprosmae                                     |      | Sporobolomyces<br>coprosmae    | Basidiomycota;<br>Pucciniomycotina;Cystobasidiomycetes;<br>Erythrobasidiales;<br>Erythrobasidiaceae;Sporobolomyces.                                          | biocontrol of<br>plant disease |



|                            |          |                                   |      |                          |                                                                                                                            |                             |
|----------------------------|----------|-----------------------------------|------|--------------------------|----------------------------------------------------------------------------------------------------------------------------|-----------------------------|
| AirGrainHNH1ITS_MID_37_387 | KT886690 | uncultured ascomycete sp. 6/97-53 |      | uncultured Ascomycota    |                                                                                                                            |                             |
| AirGrainHNH1ITS_MID_37_437 | KT886691 | uncultured Ascomycota             |      | uncultured Ascomycota    |                                                                                                                            |                             |
| AirGrainHNH1ITS_MID_38_073 | KT886692 | Phoma exigua (Boeremia exigua)    | 100% | Phoma exigua             | Ascomycota; Pezizomycotina; Dothideomycetes; Pleosporomycetidae; Pleosporales; Pleosporineae; Didymellaceae; Peyronellaea. | phytopathogen               |
| AirGrainHNH1ITS_MID_38_382 | KT886693 | Microdochium nivale               | 100% | Microdochium nivale      | Ascomycota; Pezizomycotina; Sordariomycetes; Xylariomycetidae; Xylariales; mitosporic Xylariales; Microdochium.            | phytopathogen               |
| AirGrainHNH1ITS_MID_39_046 | KT886694 | uncultured Basidiomycota          |      | uncultured Basidiomycota |                                                                                                                            |                             |
| AirGrainHNH1ITS_MID_39_364 | KT886695 | Sporobolomyces roseus             |      | Sporobolomyces roseus    | Basidiomycota; Pucciniomycotina; Cystobasidiomycetes; Erythrobasidiales; Erythrobasidiaceae; Sporobolomyces.               | biocontrol of plant disease |
| AirGrainHNH1ITS_MID_41_077 | KT886696 | Didymella exitialis               |      | Didymella exitialis      | Ascomycota; Pezizomycotina; Dothideomycetes; Pleosporomycetidae; Pleosporales; Pleosporineae; Didymellaceae; Didymella.    | phytopathogen               |
| AirGrainHNH1ITS_MID_41_260 | KT886697 | Microdochium sp. 00019            |      | Microdochium sp. 00019   | Ascomycota; Pezizomycotina; Sordariomycetes; Xylariomycetidae; Xylariales; mitosporic Xylariales; Microdochium.            | phytopathogen               |
| AirGrainHNH1ITS_MID_42_181 | KT886698 | uncultured fungus                 |      | uncultured fungus        |                                                                                                                            |                             |
| AirGrainHNH1ITS_MID_43_084 | KT886699 | Phoma herbarum                    |      | Phoma herbarum           | Ascomycota; Pezizomycotina; Dothideomycetes; Pleosporomycetidae; Pleosporales; Pleosporineae; Didymellaceae; Peyronellaea. | saprotroph                  |
| AirGrainHNH1ITS_MID_43_220 | KT886700 | Protomyces sp                     | 93%  | Protomyces sp            | Ascomycota; Taphrinomycotina; Taphrinomycetes; Taphrinales;                                                                |                             |

|                             |          |                            |     |                               |                                                                                                                                                                |                                |
|-----------------------------|----------|----------------------------|-----|-------------------------------|----------------------------------------------------------------------------------------------------------------------------------------------------------------|--------------------------------|
| AirGrainHNNH1ITS_MID_47_308 | KT886701 | uncultured fungus          |     | uncultured fungus             | Protomycetaceae; Protomyces.                                                                                                                                   |                                |
| AirGrainHNNH1ITS_MID_47_699 | KT886702 | uncultured fungus          | 99% | uncultured fungus             |                                                                                                                                                                |                                |
| AirGrainHNNH1ITS_MID_47_938 | KT886703 | uncultured fungus          |     | uncultured fungus             |                                                                                                                                                                |                                |
| AirGrainHNNH1ITS_MID_48_184 | KT886704 | Drechslera avenae          |     | Drechslera avenae             | Ascomycota;<br>Pezizomycotina;Dothideomycetes;<br>Pleosporomycetidae; Pleosporales;<br>Pleosporineae; Pleosporaceae; mitosporic<br>Pleosporaceae; Drechslera.  | phytopathogen                  |
| AirGrainHNNH1ITS_MID_48_284 | KT886705 | Phaeosphaeria sp           | 97% | uncultured fungus             | Ascomycota;<br>Pezizomycotina;Dothideomycetes;<br>Pleosporomycetidae; Pleosporales;<br>Pleosporineae;Phaeosphaeriaceae;<br>Phaeosphaeria.                      |                                |
| AirGrainHNNH1ITS_MID_5_116  | KT886706 | Sporobolomyces roseus      |     | Sporobolomyces<br>roseus      | Basidiomycota;<br>Pucciniomycotina;Cystobasidiomycetes;<br>Erythrobasidiales;<br>Erythrobasidiaceae;Sporobolomyces.                                            | biocontrol of<br>plant disease |
| AirGrainHNNH1ITS_MID_5_325  | KT886707 | Rhodotorula glutinis       |     | Rhodotorula glutinis          | Basidiomycota;<br>Pucciniomycotina;Microbotryomycetes;<br>Microbotryomycetes incertae sedis;<br>mitosporicMicrobotryomycetidae incertae<br>sedis; Rhodotorula. | phytopathogen                  |
| AirGrainHNNH1ITS_MID_5_537  | KT886708 | uncultured fungus          |     | uncultured fungus             |                                                                                                                                                                |                                |
| AirGrainHNNH1ITS_MID_50_048 | KT886709 | uncultured Ascomycota      |     | uncultured<br>Ascomycota      |                                                                                                                                                                |                                |
| AirGrainHNNH1ITS_MID_50_470 | KT886710 | Lophodermium actinothyrium | 95% | Lophodermium<br>actinothyrium | Ascomycota;<br>Pezizomycotina;Leotiomycetes;<br>Rhytismatales; Rhytismataceae;<br>Lophodermium.                                                                | endophytic                     |
| AirGrainHNNH1ITS_MID_50_851 | KT886711 | Coniothyrium sp. BF62      | 98% | Coniothyrium sp.              | Ascomycota;<br>Pezizomycotina;Dothideomycetes;<br>Pleosporomycetidae; Pleosporales;<br>Pleosporineae; Pleosporaceae;mitosporic<br>Pleosporales; Coniothyrium.  | phytopathogen                  |

|                             |          |                              |      |                            |                                                                                                                                                    |                             |
|-----------------------------|----------|------------------------------|------|----------------------------|----------------------------------------------------------------------------------------------------------------------------------------------------|-----------------------------|
| AirGrainHNNH1ITS_MID_50_861 | KT886712 | uncultured endophytic fungus |      | uncultured fungus          |                                                                                                                                                    |                             |
| AirGrainHNNH1ITS_MID_50_873 | KT886713 | Cryptococcus victoriae       | 98%  | Cryptococcus victoriae     | Basidiomycota; Agaricomycotina; Tremellomycetes; Filobasidiales; mitosporic Filobasidiales;                                                        | saprotroph                  |
| AirGrainHNNH1ITS_MID_50_972 | KT886714 | uncultured fungus            |      | uncultured fungus          |                                                                                                                                                    |                             |
| AirGrainHNNH1ITS_MID_52_281 | KT886715 | Sporobolomyces roseus        |      | Sporobolomyces roseus      | Basidiomycota; Pucciniomycotina; Cystobasidiomycetes; Erythrobasidiales; Erythrobasidiaceae; Sporobolomyces.                                       | biocontrol of plant disease |
| AirGrainHNNH1ITS_MID_55_126 | KT886716 | Hypocreales sp. NG_p26       |      | uncultured Hypocreales     | Ascomycota; Pezizomycotina; Sordariomycetes; Hypocreomycetidae; Hypocreales; mitosporic Hypocreales;                                               |                             |
| AirGrainHNNH1ITS_MID_57_042 | KT886717 | Alternaria alternata         | 100% | Alternaria alternata       | Ascomycota; Pezizomycotina; Dothideomycetes; Pleosporomycetidae; Pleosporales; Pleosporineae; Pleosporaceae; mitosporic Pleosporaceae; Alternaria; | phytopathogen               |
| AirGrainHNNH1ITS_MID_58_025 | KT886718 | uncultured Tremellomycetes   |      | uncultured Tremellomycetes | Basidiomycota; Agaricomycotina; Tremellomycetes; Tremellales; Tremellaceae                                                                         |                             |
| AirGrainHNNH1ITS_MID_58_117 | KT886719 | Mycosphaerella graminicola   |      | Mycosphaerella graminicola | Ascomycota; Pezizomycotina; Dothideomycetes; Dothideomycetidae; Capnodiales; Mycosphaerellaceae; Zymoseptoria.                                     | phytopathogen               |
| AirGrainHNNH1ITS_MID_58_220 | KT886720 | Cryptococcus laurentii       | 100% | Cryptococcus laurentii     | Basidiomycota; Agaricomycotina; Tremellomycetes; Filobasidiales; mitosporic Filobasidiales;                                                        |                             |
| AirGrainHNNH1ITS_MID_6_397  | KT886721 | uncultured Cryptococcus      |      | uncultured Cryptococcus    | Basidiomycota; Agaricomycotina; Tremellomycetes; Filobasidiales; mitosporic Filobasidiales;                                                        |                             |
| AirGrainHNNH1ITS_MID_60_107 | KT886722 | Alternaria ethzedia          | 97%  | Alternaria ethzedia        | Ascomycota; Pezizomycotina; Dothideomycetes; Pleosporomycetidae; Pleosporales;                                                                     | phytopathogen               |

|                             |          |                                                             |      |                              |                                                                                                                                      |                             |
|-----------------------------|----------|-------------------------------------------------------------|------|------------------------------|--------------------------------------------------------------------------------------------------------------------------------------|-----------------------------|
| AirGrainHNNH1ITS_MID_61_024 | KT886723 | uncultured Ascomycota sp. I306                              | 98%  | uncultured Ascomycota        | Pleosporineae;Pleosporaceae; Lewia.                                                                                                  |                             |
| AirGrainHNNH1ITS_MID_61_142 | KT886724 | uncultured endophytic fungus                                | 98%  | uncultured fungus            |                                                                                                                                      |                             |
| AirGrainHNNH1ITS_MID_64_116 | KT886725 | uncultured fungus                                           | 96%  | uncultured fungus            |                                                                                                                                      |                             |
| AirGrainHNNH1ITS_MID_65_093 | KT886726 | uncultured fungus                                           | 99%  | uncultured fungus            |                                                                                                                                      |                             |
| AirGrainHNNH1ITS_MID_68_204 | KT886727 | Tilletiopsis washingtonensis                                | 100% | Tilletiopsis washingtonensis | Basidiomycota; Ustilaginomycotina;Exobasidiomycetes; Entylomatales; Entylomatales incertae sedis.                                    |                             |
| AirGrainHNNH1ITS_MID_69_116 | KT886728 | Cryptococcus sp. BF108                                      | 99%  | Cryptococcus sp.             | Basidiomycota; Agaricomycotina;Tremellomycetes; Filobasidiales; mitosporic Filobasidiales;                                           | saprotroph                  |
| AirGrainHNNH1ITS_MID_72_088 | KT886729 | Didymella exitialis                                         | 93%  | Didymella exitialis          | Ascomycota; Pezizomycotina;Dothideomycetes; Pleosporomycetidae; Pleosporales; Pleosporineae; Didymellaceae; Didymella.               | phytopathogen               |
| AirGrainHNNH1ITS_MID_73_174 | KT886730 | Sporobolomyces roseus /Sporobolomyces ruberrimus var. albus | 99%  | Sporobolomyces roseus        | Basidiomycota; Pucciniomycotina;Cystobasidiomycetes; Erythrobasidiales; Erythrobasidiaceae;Sporobolomyces.                           | biocontrol of plant disease |
| AirGrainHNNH1ITS_MID_74_004 | KT886731 | Cladosporium herbarum                                       | 100% | Cladosporium herbarum        | Ascomycota; Pezizomycotina;Dothideomycetes; Dothideomycetidae; Capnodiales; Davidiellaceae; mitosporic Davidiellaceae; Cladosporium. |                             |
| AirGrainHNNH1ITS_MID_74_144 | KT886732 | uncultured Pleospora                                        | 100% | uncultured Pleospora         | Ascomycota; Pezizomycotina;Dothideomycetes; Pleosporomycetidae; Pleosporales; Pleosporineae; Pleosporaceae; Pleospora.               |                             |
| AirGrainHNNH1ITS_MID_74_169 | KT886733 | Phaeosphaeria nodorum                                       | 98%  | Phaeosphaeria nodorum        | Ascomycota; Pezizomycotina;Dothideomycetes; Pleosporomycetidae; Pleosporales; Pleosporineae;Phaeosphaeriaceae; Phaeosphaeria.        | phytopathogen               |

|                             |          |                                                    |      |                              |                                                                                                                                                                |               |
|-----------------------------|----------|----------------------------------------------------|------|------------------------------|----------------------------------------------------------------------------------------------------------------------------------------------------------------|---------------|
| AirGrainHNNH1ITS_MID_74_293 | KT886734 | Acremonium rutilum                                 | 100% | Acremonium rutilum           | Ascomycota;<br>Pezizomycotina;Sordariomycetes;<br>Hypocreomycetidae; Hypocreales;<br>mitosporic Hypocreales; Acremonium.                                       | phytopathogen |
| AirGrainHNNH1ITS_MID_76_369 | KT886735 | uncultured fungus                                  | 96%  | uncultured fungus            |                                                                                                                                                                |               |
| AirGrainHNNH1ITS_MID_76_384 | KT886736 | Microdochium sp. 00019                             | 97%  | Microdochium sp.             | Ascomycota;<br>Pezizomycotina;Sordariomycetes;<br>Xylariomycetidae; Xylariales; mitosporic<br>Xylariales; Microdochium.                                        | phytopathogen |
| AirGrainHNNH1ITS_MID_77_207 | KT886737 | uncultured Cryptococcus                            | 96%  | uncultured<br>Cryptococcus   | Basidiomycota;<br>Agaricomycotina;Tremellomycetes;<br>Filobasidiales; mitosporic Filobasidiales;                                                               |               |
| AirGrainHNNH1ITS_MID_78_106 | KT886738 | uncultured Ascomycota sp.<br>LM221                 | 99%  | uncultured<br>Ascomycota sp. |                                                                                                                                                                |               |
| AirGrainHNNH1ITS_MID_79_034 | KT886739 | Cryptococcus victoriae<br>/uncultured Cryptococcus | 95%  | uncultured<br>Cryptococcus   | Basidiomycota;<br>Agaricomycotina;Tremellomycetes;<br>Filobasidiales; mitosporic Filobasidiales;                                                               | saprotroph    |
| AirGrainHNNH1ITS_MID_79_046 | KT886740 | uncultured Basidiomycota                           | 98%  | uncultured<br>Basidiomycota  |                                                                                                                                                                |               |
| AirGrainHNNH1ITS_MID_80_021 | KT886741 | Rhodotorula fujisanensis                           | 100% | Rhodotorula<br>fujisanensis  | Basidiomycota;<br>Pucciniomycotina;Microbotryomycetes;<br>Microbotryomycetes incertae sedis;<br>mitosporicMicrobotryomycetidae incertae<br>sedis; Rhodotorula. | phytopathogen |
| AirGrainHNNH1ITS_MID_80_195 | KT886742 | Alternaria conjuncta                               | 99%  | Alternaria conjuncta         | Ascomycota;<br>Pezizomycotina;Dothideomycetes;<br>Pleosporomycetidae; Pleosporales;<br>Pleosporineae;Pleosporaceae; mitosporic<br>Pleosporaceae; Alternaria;   | phytopathogen |
| AirGrainHNNH1ITS_MID_89_123 | KT886743 | uncultured fungus                                  | 95%  | uncultured fungus            |                                                                                                                                                                |               |
| AirGrainHNNH1ITS_MID_91_724 | KT886744 | uncultured fungus                                  | 100% | uncultured fungus            |                                                                                                                                                                |               |
| AirGrainHNNH1ITS_MID_96_136 | KT886745 | Phaeosphaeria nodorum                              | 90%  | Phaeosphaeria<br>nodorum     | Ascomycota;<br>Pezizomycotina;Dothideomycetes;<br>Pleosporomycetidae; Pleosporales;<br>Pleosporineae;Phaeosphaeriaceae;                                        | phytopathogen |

|                             |          |                                           |      |                             |                                                                                                                                                                                          |                                |
|-----------------------------|----------|-------------------------------------------|------|-----------------------------|------------------------------------------------------------------------------------------------------------------------------------------------------------------------------------------|--------------------------------|
| AirGrainH2H2ITS_MID_103_362 | KT886746 | Leptosphaeria sp. GFI 123                 | 100% | Leptosphaeria sp.           | Phaeosphaeria.<br>Ascomycota; Pezizomycotina;Dothideomycetes;<br>Pleosporomycetidae; Pleosporales;<br>Pleosporineae;Leptosphaeriaceae; Leptosphaeria;<br>Leptosphaeria maculans complex. |                                |
| AirGrainH2H2ITS_MID_104_154 | KT886747 | uncultured Taphrina                       | 98%  | uncultured Taphrina         | Ascomycota;<br>Taphrinomycotina;Taphrinomycetes;<br>Taphrinales; Taphrinaceae; Taphrina.                                                                                                 |                                |
| AirGrainH2H2ITS_MID_107_421 | KT886748 | uncultured Basidiomycota                  | 100% | uncultured<br>Basidiomycota |                                                                                                                                                                                          |                                |
| AirGrainH2H2ITS_MID_108_033 | KT886749 | uncultured Cryptococcus                   | 98%  | uncultured<br>Cryptococcus  | Basidiomycota;<br>Agaricomycotina;Tremellomycetes;<br>Filobasidiales; mitosporic Filobasidiales;                                                                                         |                                |
| AirGrainH2H2ITS_MID_108_206 | KT886750 | uncultured Basidiomycota                  | 100% | uncultured<br>Basidiomycota |                                                                                                                                                                                          |                                |
| AirGrainH2H2ITS_MID_11_274  | KT886751 | uncultured fungus                         | 98%  | uncultured fungus           |                                                                                                                                                                                          |                                |
| AirGrainH2H2ITS_MID_11_296  | KT886752 | uncultured fungus                         | 98%  | uncultured fungus           |                                                                                                                                                                                          |                                |
| AirGrainH2H2ITS_MID_110_077 | KT886753 | uncultured fungus                         | 93%  | uncultured fungus           |                                                                                                                                                                                          |                                |
| AirGrainH2H2ITS_MID_110_245 | KT886754 | fungal sp. FL-2010d                       | 98%  | Alternaria sp.              |                                                                                                                                                                                          |                                |
| AirGrainH2H2ITS_MID_111_370 | KT886755 | Alternaria conjuncta                      | 96%  | Alternaria sp.              | Ascomycota;<br>Pezizomycotina;Dothideomycetes;<br>Pleosporomycetidae; Pleosporales;<br>Pleosporineae;Pleosporaceae; mitosporic<br>Pleosporaceae; Alternaria;                             | phytopathogen                  |
| AirGrainH2H2ITS_MID_113_197 | KT886756 | Gibberella zeae (Fusarium<br>graminearum) | 99%  | Fusarium<br>graminearum     | Ascomycota;<br>Pezizomycotina;Sordariomycetes;<br>Hypocreomycetidae; Hypocreales;<br>Nectriaceae;Gibberella.                                                                             | phytopathogen                  |
| AirGrainH2H2ITS_MID_114_131 | KT886757 | Pleosporales sp. PIMO_118                 | 98%  | uncultured<br>Pleosporales  | Ascomycota;<br>Pezizomycotina;Dothideomycetes;<br>Pleosporomycetidae; Pleosporales;                                                                                                      | phytopathogen                  |
| AirGrainH2H2ITS_MID_114_260 | KT886758 | Sporobolomyces sp. Vega543                | 94%  | Sporobolomyces sp.          | Basidiomycota;<br>Pucciniomycotina;Cystobasidiomycetes;<br>Erythrobasidiales;<br>Erythrobasidiaceae;Sporobolomyces.                                                                      | biocontrol of<br>plant disease |

|                             |          |                           |      |                          |                                                                                                                                     |               |
|-----------------------------|----------|---------------------------|------|--------------------------|-------------------------------------------------------------------------------------------------------------------------------------|---------------|
| AirGrainH2H2ITS_MID_114_325 | KT886759 | uncultured Pleosporaceae  | 94%  | uncultured Pleosporaceae | Ascomycota; Pezizomycotina;Dothideomycetes; Pleosporomycetidae; Pleosporales; Pleosporineae;Pleosporaceae; mitosporic Pleosporaceae |               |
| AirGrainH2H2ITS_MID_116_298 | KT886760 | uncultured fungus         | 97%  | uncultured fungus        |                                                                                                                                     |               |
| AirGrainH2H2ITS_MID_117_261 | KT886761 | Alternaria infectoria     | 100% | Alternaria infectoria    | Ascomycota; Pezizomycotina;Dothideomycetes; Pleosporomycetidae; Pleosporales; Pleosporineae;Pleosporaceae; Lewia.                   | phytopathogen |
| AirGrainH2H2ITS_MID_123_088 | KT886762 | Didymella exitialis       | 100% | Didymella exitialis      | Ascomycota; Pezizomycotina;Dothideomycetes; Pleosporomycetidae; Pleosporales; Pleosporineae; Didymellaceae; Didymella.              | phytopathogen |
| AirGrainH2H2ITS_MID_123_169 | KT886763 | Alternaria infectoria     | 99%  | Alternaria infectoria    | Ascomycota; Pezizomycotina;Dothideomycetes; Pleosporomycetidae; Pleosporales; Pleosporineae;Pleosporaceae; Lewia.                   | phytopathogen |
| AirGrainH2H2ITS_MID_126_247 | KT886764 | Cryptococcus sp. HB 1222  | 100% | Cryptococcus sp.         | Basidiomycota; Agaricomycotina;Tremellomycetes; Filobasidiales; mitosporic Filobasidiales;                                          | saprotroph    |
| AirGrainH2H2ITS_MID_127_259 | KT886765 | Fusarium oxysporum        | 100% | Fusarium oxysporum       | Ascomycota; Pezizomycotina;Sordariomycetes; Hypocreomycetidae; Hypocreales; mitosporic Hypocreales; Fusarium.                       | phytopathogen |
| AirGrainH2H2ITS_MID_130_127 | KT886766 | Sporidiobolales sp. LM531 | 96%  | Sporidiobolales sp.      | Basidiomycota; Pucciniomycotina;Microbotryomycetes; Sporidiobolales                                                                 | saprotroph    |
| AirGrainH2H2ITS_MID_131_222 | KT886767 | Alternaria ethzedia       | 98%  | Alternaria ethzedia      | Ascomycota; Pezizomycotina;Dothideomycetes; Pleosporomycetidae; Pleosporales; Pleosporineae;Pleosporaceae; Lewia.                   |               |
| AirGrainH2H2ITS_MID_152_063 | KT886768 | Rhodotorula sp. HB 1211   | 98%  | Rhodotorula sp.          | Basidiomycota; Pucciniomycotina;Microbotryomycetes; Microbotryomycetes incertae sedis;                                              | phytopathogen |

|                              |          |                                                     |      |                     |                                                                                                                                                                                           |               |
|------------------------------|----------|-----------------------------------------------------|------|---------------------|-------------------------------------------------------------------------------------------------------------------------------------------------------------------------------------------|---------------|
| AirGrainHNNH2ITS_MID_152_065 | KT886769 | Alternaria ethzedia                                 | 95%  | Alternaria sp.      | mitosporicMicrobotryomycetidae incertae sedis; Rhodotorula.<br>Ascomycota;<br>Pezizomycotina;Dothideomycetes;<br>Pleosporomycetidae; Pleosporales;<br>Pleosporineae;Pleosporaceae; Lewia. | phytopathogen |
| AirGrainHNNH2ITS_MID_152_331 | KT886770 | uncultured fungus                                   | 89%  | uncultured fungus   |                                                                                                                                                                                           |               |
| AirGrainHNNH2ITS_MID_152_810 | KT886771 | uncultured fungus                                   | 98%  | uncultured fungus   |                                                                                                                                                                                           |               |
| AirGrainHNNH2ITS_MID_152_875 | KT886772 | uncultured fungus                                   | 98%  | uncultured fungus   |                                                                                                                                                                                           |               |
| AirGrainHNNH2ITS_MID_152_938 | KT886773 | fungal sp. FL-2010d                                 | 95%  | uncultured fungus   |                                                                                                                                                                                           |               |
| AirGrainHNNH2ITS_MID_19_120  | KT886774 | Phaeosphaeria pontiformis<br>/Phaeosphaeria eustoma |      | Phaeosphaeria sp.   | Ascomycota;<br>Pezizomycotina;Dothideomycetes;<br>Pleosporomycetidae; Pleosporales;<br>Pleosporineae;Phaeosphaeriaceae;<br>Phaeosphaeria.                                                 | phytopathogen |
| AirGrainHNNH2ITS_MID_22_075  | KT886775 | Chalastospora gossypii                              | 95%  | Chalastospora sp.   | Ascomycota;<br>Pezizomycotina;Dothideomycetes;<br>Pleosporomycetidae; Pleosporales;<br>Pleosporineae; Pleosporaceae;mitosporic<br>Pleosporales; Chalastospora.                            | phytopathogen |
| AirGrainHNNH2ITS_MID_22_091  | KT886776 | Alternaria ethzedia                                 | 98%  | Alternaria ethzedia | Ascomycota;<br>Pezizomycotina;Dothideomycetes;<br>Pleosporomycetidae; Pleosporales;<br>Pleosporineae;Pleosporaceae; Lewia.                                                                | phytopathogen |
| AirGrainHNNH2ITS_MID_22_123  | KT886777 | fungal sp. FL-2010d                                 | 98%  | uncultured fungus   |                                                                                                                                                                                           |               |
| AirGrainHNNH2ITS_MID_26_255  | KT886778 | uncultured fungus                                   | 100% | uncultured fungus   |                                                                                                                                                                                           |               |
| AirGrainHNNH2ITS_MID_32_463  | KT886779 | uncultured fungus                                   | 99%  | uncultured fungus   |                                                                                                                                                                                           |               |
| AirGrainHNNH2ITS_MID_32_508  | KT886780 | uncultured fungus                                   | 96%  | uncultured fungus   |                                                                                                                                                                                           |               |
| AirGrainHNNH2ITS_MID_34_242  | KT886781 | uncultured fungus                                   | 96%  | uncultured fungus   |                                                                                                                                                                                           |               |
| AirGrainHNNH2ITS_MID_36_275  | KT886782 | Stagonospora sp. 4/99-5                             | 97%  | Stagonospora sp.    | Ascomycota;<br>Pezizomycotina;Dothideomycetes;<br>Pleosporomycetidae; Pleosporales;<br>Pleosporineae; Pleosporaceae; mitosporic<br>Pleosporaceae; Stagonospora.                           | phytopathogen |



|                            |          |                         |      |                         |                                                                                                                     |                             |
|----------------------------|----------|-------------------------|------|-------------------------|---------------------------------------------------------------------------------------------------------------------|-----------------------------|
| AirGrainH2H2ITS_MID_36_380 | KT886783 | Cryptococcus wieringae  | 99%  | Cryptococcus wieringae  | Basidiomycota; Agaricomycotina; Tremellomycetes; Filobasidiales; mitosporic Filobasidiales;                         | saprotroph                  |
| AirGrainH2H2ITS_MID_39_391 | KT886784 | uncultured fungus       | 98%  | uncultured fungus       |                                                                                                                     |                             |
| AirGrainH2H2ITS_MID_4_394  | KT886785 | uncultured fungus       | 96%  | uncultured fungus       |                                                                                                                     |                             |
| AirGrainH2H2ITS_MID_41_125 | KT886786 | uncultured Ascomycota   | 100% | uncultured Ascomycota   |                                                                                                                     |                             |
| AirGrainH2H2ITS_MID_41_316 | KT886787 | uncultured fungus       | 96%  | uncultured fungus       |                                                                                                                     |                             |
| AirGrainH2H2ITS_MID_41_328 | KT886788 | uncultured fungus       | 100% | uncultured fungus       |                                                                                                                     |                             |
| AirGrainH2H2ITS_MID_43_207 | KT886789 | Fusarium poae           | 100% | Fusarium poae           | Ascomycota; Pezizomycotina; Sordariomycetes; Hypocreomycetidae; Hypocreales; mitosporic Hypocreales; Fusarium.      | phytopathogen               |
| AirGrainH2H2ITS_MID_45_180 | KT886790 | uncultured fungus       | 100% | uncultured fungus       |                                                                                                                     |                             |
| AirGrainH2H2ITS_MID_45_274 | KT886791 | uncultured fungus       | 95%  | uncultured fungus       |                                                                                                                     |                             |
| AirGrainH2H2ITS_MID_51_365 | KT886792 | Alternaria ethzedia     | 98%  | Alternaria ethzedia     | Ascomycota; Pezizomycotina; Dothideomycetes; Pleosporomycetidae; Pleosporales; Pleosporineae; Pleosporaceae; Lewia. | phytopathogen               |
| AirGrainH2H2ITS_MID_57_041 | KT886793 | uncultured fungus       | 98%  | uncultured fungus       |                                                                                                                     |                             |
| AirGrainH2H2ITS_MID_59_018 | KT886794 | uncultured fungus       | 99%  | uncultured fungus       |                                                                                                                     |                             |
| AirGrainH2H2ITS_MID_61_050 | KT886795 | uncultured fungus       | 99%  | uncultured fungus       |                                                                                                                     |                             |
| AirGrainH2H2ITS_MID_62_203 | KT886796 | uncultured fungus       | 99%  | uncultured fungus       |                                                                                                                     |                             |
| AirGrainH2H2ITS_MID_62_381 | KT886797 | Sporobolomyces roseus   | 98%  | Sporobolomyces roseus   | Basidiomycota; Pucciniomycotina; Cystobasidiomycetes; Erythrobasidiales; Erythrobasidiaceae; Sporobolomyces.        | biocontrol of plant disease |
| AirGrainH2H2ITS_MID_63_072 | KT886798 | uncultured Cryptococcus | 98%  | uncultured Cryptococcus | Basidiomycota; Agaricomycotina; Tremellomycetes; Filobasidiales; mitosporic Filobasidiales;                         |                             |
| AirGrainH2H2ITS_MID_63_306 | KT886799 | Cryptococcus victoriae  | 98%  | Cryptococcus victoriae  | Basidiomycota; Agaricomycotina; Tremellomycetes; Filobasidiales; mitosporic Filobasidiales;                         | saprotroph                  |
| AirGrainH2H2ITS_MID_63_371 | KT886800 | Alternaria ethzedia     | 98%  | Alternaria ethzedia     | Ascomycota;                                                                                                         | phytopathogen               |

|                            |          |                                                        |      |                       |                                                                                                                                                                                                                  |                             |
|----------------------------|----------|--------------------------------------------------------|------|-----------------------|------------------------------------------------------------------------------------------------------------------------------------------------------------------------------------------------------------------|-----------------------------|
| AirGrainH2H2ITS_MID_64_146 | KT886801 | Sporobolomyces roseus                                  | 97%  | Sporobolomyces roseus | Pezizomycotina;Dothideomycetes; Pleosporomycetidae; Pleosporales; Pleosporineae;Pleosporaceae; Lewia. Basidiomycota; Pucciniomycotina;Cystobasidiomycetes; Erythrobasidiales; Erythrobasidiaceae;Sporobolomyces. | biocontrol of plant disease |
| AirGrainH2H2ITS_MID_68_028 | KT886802 | Alternaria infectoria                                  | 99%  | Alternaria infectoria | Ascomycota; Pezizomycotina;Dothideomycetes; Pleosporomycetidae; Pleosporales; Pleosporineae;Pleosporaceae; Lewia.                                                                                                | phytopathogen               |
| AirGrainH2H2ITS_MID_68_286 | KT886803 | uncultured fungus                                      | 98%  | uncultured fungus     |                                                                                                                                                                                                                  |                             |
| AirGrainH2H2ITS_MID_7_018  | KT886804 | Davidiella tassiana (Cladosporium herbarum)            | 100% | Cladosporium herbarum | Ascomycota; Pezizomycotina;Dothideomycetes; Dothideomycetidae; Capnodiales; Davidiellaceae; mitosporic Davidiellaceae; Cladosporium.                                                                             | phytopathogen               |
| AirGrainH2H2ITS_MID_70_193 | KT886805 | Fusarium equiseti                                      | 97%  | Fusarium equiseti     | Ascomycota; Pezizomycotina;Sordariomycetes; Hypocreomycetidae; Hypocreales; mitosporic Hypocreales; Fusarium.                                                                                                    | phytopathogen               |
| AirGrainH2H2ITS_MID_70_215 | KT886806 | Penicillium sp. CID1245                                | 99%  | Penicillium sp.       | Ascomycota; Pezizomycotina;Eurotiomycetes; Eurotiomycetidae; Eurotiales; Trichocomaceae;mitosporic Trichocomaceae; Penicillium.                                                                                  | saprotroph                  |
| AirGrainH2H2ITS_MID_70_243 | KT886807 | uncultured fungus                                      | 93%  | uncultured fungus     |                                                                                                                                                                                                                  |                             |
| AirGrainH2H2ITS_MID_71_114 | KT886808 | Fusarium poae                                          | 100% | Fusarium poae         | Ascomycota; Pezizomycotina;Sordariomycetes; Hypocreomycetidae; Hypocreales; mitosporic Hypocreales; Fusarium.                                                                                                    | phytopathogen               |
| AirGrainH2H2ITS_MID_79_618 | KT886809 | Cladosporium cucumerinum /Cladosporium cladosporioides | 97%  | Cladosporium sp.      | Ascomycota; Pezizomycotina;Dothideomycetes; Dothideomycetidae; Capnodiales; Davidiellaceae; mitosporic Davidiellaceae;                                                                                           | phytopathogen               |

|                               |          |                                                 |      |                         |                                                                                                                                                                |               |
|-------------------------------|----------|-------------------------------------------------|------|-------------------------|----------------------------------------------------------------------------------------------------------------------------------------------------------------|---------------|
| AirGrainHNNH2ITS_MID_87_411   | KT886810 | uncultured fungus                               | 98%  | uncultured fungus       | Cladosporium.                                                                                                                                                  |               |
| AirGrainHNNH2ITS_MID_91_256   | KT886811 | uncultured fungus                               | 100% | uncultured fungus       |                                                                                                                                                                |               |
| AirGrainHNNH2ITS_MID_91_366   | KT886812 | uncultured fungus                               | 94%  | uncultured fungus       |                                                                                                                                                                |               |
| AirGrainHNNH3ITS2_MID_1_304   | KT886813 | uncultured fungus                               | 98%  | uncultured fungus       |                                                                                                                                                                |               |
| AirGrainHNNH3ITS2_MID_1_362   | KT886814 | uncultured fungus                               | 98%  | uncultured fungus       |                                                                                                                                                                |               |
| AirGrainHNNH3ITS2_MID_10_0033 | KT886815 | Chalastospora gossypii                          | 96%  | Chalastospora sp.       | Ascomycota;<br>Pezizomycotina;Dothideomycetes;<br>Pleosporomycetidae; Pleosporales;<br>Pleosporineae; Pleosporaceae;mitosporic<br>Pleosporales; Chalastospora. | phytopathogen |
| AirGrainHNNH3ITS2_MID_10_0182 | KT886816 | Fusarium poae                                   | 100% | Fusarium poae           | Ascomycota;<br>Pezizomycotina;Sordariomycetes;<br>Hypocreomycetidae; Hypocreales;<br>mitosporic Hypocreales; Fusarium.                                         | phytopathogen |
| AirGrainHNNH3ITS2_MID_10_0836 | KT886817 | Gibberella avenacea                             | 92%  | Gibberella sp.          | Ascomycota;<br>Pezizomycotina;Sordariomycetes;<br>Hypocreomycetidae; Hypocreales;<br>Nectriaceae;Gibberella.                                                   | phytopathogen |
| AirGrainHNNH3ITS2_MID_10_1105 | KT886818 | Alternaria ethzedia                             | 99%  | Alternaria ethzedia     | Ascomycota;<br>Pezizomycotina;Dothideomycetes;<br>Pleosporomycetidae; Pleosporales;<br>Pleosporineae;Pleosporaceae; Lewia.                                     | phytopathogen |
| AirGrainHNNH3ITS2_MID_11_0273 | KT886819 | Didymella exitialis                             | 97%  | Didymella exitialis     | Ascomycota;<br>Pezizomycotina;Dothideomycetes;<br>Pleosporomycetidae; Pleosporales;<br>Pleosporineae; Didymellaceae; Didymella.                                | phytopathogen |
| AirGrainHNNH3ITS2_MID_11_0664 | KT886820 | uncultured fungus                               | 93%  | uncultured fungus       |                                                                                                                                                                |               |
| AirGrainHNNH3ITS2_MID_11_0887 | KT886821 | Alternaria ethzedia                             | 97%  | Alternaria ethzedia     | Ascomycota;<br>Pezizomycotina;Dothideomycetes;<br>Pleosporomycetidae; Pleosporales;<br>Pleosporineae;Pleosporaceae; Lewia.                                     | phytopathogen |
| AirGrainHNNH3ITS2_MID_135_078 | KT886822 | Capronia semiimmersa<br>(Phialophora americana) | 100% | Capronia<br>semiimmersa | Ascomycota;<br>Pezizomycotina;Eurotiomycetes;<br>Chaetothyriomycetidae;                                                                                        | saprotroph    |

|                            |          |                        |      |                           |                                                                                                                                                                              |               |
|----------------------------|----------|------------------------|------|---------------------------|------------------------------------------------------------------------------------------------------------------------------------------------------------------------------|---------------|
| AirGrainH3ITS2_MID_135_353 | KT886823 | Alternaria infectoria  | 98%  | Alternaria infectoria     | Chaetothyriales;Herpotrichiellaceae; Capronia.<br>Ascomycota;<br>Pezizomycotina;Dothideomycetes;<br>Pleosporomycetidae; Pleosporales;<br>Pleosporineae;Pleosporaceae; Lewia. | phytopathogen |
| AirGrainH3ITS2_MID_140_062 | KT886824 | Alternaria infectoria  | 100% | Alternaria infectoria     | Ascomycota;<br>Pezizomycotina;Dothideomycetes;<br>Pleosporomycetidae; Pleosporales;<br>Pleosporineae;Pleosporaceae; Lewia.                                                   | phytopathogen |
| AirGrainH3ITS2_MID_140_514 | KT886825 | Alternaria ethzedia    | 97%  | Alternaria ethzedia       | Ascomycota;<br>Pezizomycotina;Dothideomycetes;<br>Pleosporomycetidae; Pleosporales;<br>Pleosporineae;Pleosporaceae; Lewia.                                                   | phytopathogen |
| AirGrainH3ITS2_MID_141_248 | KT886826 | uncultured fungus      | 99%  | uncultured fungus         |                                                                                                                                                                              |               |
| AirGrainH3ITS2_MID_143_124 | KT886827 | uncultured Didymella   | 98%  | uncultured<br>Didymella   | Ascomycota;<br>Pezizomycotina;Dothideomycetes;<br>Pleosporomycetidae; Pleosporales;<br>Pleosporineae; Didymellaceae; Didymella.                                              |               |
| AirGrainH3ITS2_MID_143_168 | KT886828 | Alternaria infectoria  | 97%  | Alternaria infectoria     | Ascomycota;<br>Pezizomycotina;Dothideomycetes;<br>Pleosporomycetidae; Pleosporales;<br>Pleosporineae;Pleosporaceae; Lewia.                                                   | phytopathogen |
| AirGrainH3ITS2_MID_146_428 | KT886829 | Alternaria conjuncta   | 98%  | Alternaria conjuncta      | Ascomycota;<br>Pezizomycotina;Dothideomycetes;<br>Pleosporomycetidae; Pleosporales;<br>Pleosporineae;Pleosporaceae; mitosporic<br>Pleosporaceae; Alternaria;                 | phytopathogen |
| AirGrainH3ITS2_MID_149_087 | KT886830 | uncultured Ascomycota  | 100% | uncultured<br>Ascomycota  |                                                                                                                                                                              |               |
| AirGrainH3ITS2_MID_149_107 | KT886831 | uncultured fungus      | 100% | uncultured fungus         |                                                                                                                                                                              |               |
| AirGrainH3ITS2_MID_149_452 | KT886832 | Microdochium sp. 00019 | 99%  | Microdochium sp.<br>00019 | Ascomycota;<br>Pezizomycotina;Sordariomycetes;<br>Xylariomycetidae; Xylariales; mitosporic<br>Xylariales; Microdochium.                                                      | phytopathogen |

|                            |          |                         |      |                            |                                                                                                                                                                |               |
|----------------------------|----------|-------------------------|------|----------------------------|----------------------------------------------------------------------------------------------------------------------------------------------------------------|---------------|
| AirGrainH3ITS2_MID_150_138 | KT886833 | fungal sp. FL-2010d     | 98%  | uncultured fungus          |                                                                                                                                                                |               |
| AirGrainH3ITS2_MID_150_499 | KT886834 | Chalastospora cetera    | 98%  | Chalastospora cetera       | Ascomycota;<br>Pezizomycotina;Dothideomycetes;<br>Pleosporomycetidae; Pleosporales;<br>Pleosporineae; Pleosporaceae;mitosporic<br>Pleosporales; Chalastospora. |               |
| AirGrainH3ITS2_MID_151_557 | KT886835 | uncultured fungus       | 100% | uncultured fungus          |                                                                                                                                                                |               |
| AirGrainH3ITS2_MID_153_120 | KT886836 | Chalastospora gossypii  | 94%  | Chalastospora sp.          | Ascomycota;<br>Pezizomycotina;Dothideomycetes;<br>Pleosporomycetidae; Pleosporales;<br>Pleosporineae; Pleosporaceae;mitosporic<br>Pleosporales; Chalastospora. | phytopathogen |
| AirGrainH3ITS2_MID_17_161  | KT886837 | Alternaria ethzedia     | 96%  | Alternaria sp.             | Ascomycota;<br>Pezizomycotina;Dothideomycetes;<br>Pleosporomycetidae; Pleosporales;<br>Pleosporineae;Pleosporaceae; Lewia.                                     | phytopathogen |
| AirGrainH3ITS2_MID_2_459   | KT886838 | uncultured Cryptococcus | 97%  | uncultured<br>Cryptococcus | Basidiomycota;<br>Agaricomycotina;Tremellomycetes;<br>Filobasidiales; mitosporic Filobasidiales;                                                               |               |
| AirGrainH3ITS2_MID_23_054  | KT886839 | uncultured fungus       | 96%  | uncultured fungus          |                                                                                                                                                                |               |
| AirGrainH3ITS2_MID_30_313  | KT886840 | Alternaria ethzedia     | 99%  | Alternaria ethzedia        | Ascomycota;<br>Pezizomycotina;Dothideomycetes;<br>Pleosporomycetidae; Pleosporales;<br>Pleosporineae;Pleosporaceae; Lewia.                                     | phytopathogen |
| AirGrainH3ITS2_MID_35_306  | KT886841 | Alternaria conjuncta    | 98%  | Alternaria conjuncta       | Ascomycota;<br>Pezizomycotina;Dothideomycetes;<br>Pleosporomycetidae; Pleosporales;<br>Pleosporineae;Pleosporaceae; mitosporic<br>Pleosporaceae; Alternaria;   | phytopathogen |

**Table S6.** Frequency of the OTUs with at least two reads in aerosol and grain dust samples depending on the farming system.

In bold the known allergenic or toxigenic species.

| OTU identifiant               | Genbank accession numbers | Species name                         | Aerosols sample, % |           |              | Grain Sample, % |           |              |
|-------------------------------|---------------------------|--------------------------------------|--------------------|-----------|--------------|-----------------|-----------|--------------|
|                               |                           |                                      | Organic            | Extensive | Conventional | Organic         | Extensive | Conventional |
| AirGrainHNNH1ITS_MID_1_002    | KT886526                  | Passalora robiniae                   | 100.0              | 100.0     | 100.0        | 100.0           | 100.0     | 100.0        |
| AirGrainHNNH1ITS_MID_1_009    | KT886531                  | <b>Lewia (Alternaria) ethzedia</b>   | 100.0              | 100.0     | 100.0        | 100.0           | 100.0     | 100.0        |
| AirGrainHNNH1ITS_MID_1_012    | KT886532                  | <b>Epicoccum nigrum</b>              | 100.0              | 100.0     | 100.0        | 100.0           | 100.0     | 100.0        |
| AirGrainHNNH1ITS_MID_1_019    | KT886536                  | Cryptococcus victoriae               | 100.0              | 94.4      | 98.1         | 100.0           | 100.0     | 100.0        |
| AirGrainHNNH1ITS_MID_1_004    | KT886527                  | <b>Cladosporium cladosporioides</b>  | 100.0              | 100.0     | 98.1         | 100.0           | 100.0     | 98.6         |
| AirGrainHNNH1ITS_MID_1_084    | KT886541                  | Didymella exitialis                  | 100.0              | 100.0     | 83.0         | 100.0           | 100.0     | 97.1         |
| AirGrainHNNH1ITS_MID_1_014    | KT886534                  | <b>Alternaria alternata</b>          | 100.0              | 83.3      | 84.9         | 87.5            | 96.3      | 94.2         |
| AirGrainHNNH1ITS_MID_1_039    | KT886538                  | uncultured Cryptococcus              | 50.0               | 83.3      | 64.2         | 100.0           | 100.0     | 91.3         |
| AirGrainHNNH1ITS_MID_102_017  | KT886562                  | <b>Fusarium poae</b>                 | 0.0                | 50.0      | 43.4         | 75.0            | 81.5      | 91.3         |
| AirGrainHNNH2ITS_MID_117_261  | KT886761                  | <b>Lewia (Alternaria) infectoria</b> | 62.5               | 61.1      | 52.8         | 87.5            | 88.9      | 91.3         |
| AirGrainHNNH1ITS_MID_1_006    | KT886529                  | Sporobolomyces roseus                | 75.0               | 66.7      | 81.1         | 100.0           | 74.1      | 89.9         |
| AirGrainHNNH1ITS_MID_1_013    | KT886533                  | <b>Fusarium graminearum</b>          | 0.0                | 61.1      | 50.9         | 62.5            | 88.9      | 89.9         |
| AirGrainHNNH1ITS_MID_101_012  | KT886557                  | Gibberella sp.                       | 25.0               | 55.6      | 34.0         | 62.5            | 77.8      | 84.1         |
| AirGrainHNNH1ITS_MID_1_334    | KT886549                  | Mycosphaerella graminicola           | 25.0               | 94.4      | 47.2         | 25.0            | 88.9      | 75.4         |
| AirGrainHNNH1ITS_MID_101_019  | KT886558                  | Microdochium nivale                  | 50.0               | 88.9      | 64.2         | 37.5            | 70.4      | 68.1         |
| AirGrainHNNH1ITS_MID_1_008    | KT886530                  | Aureobasidium pullulans              | 25.0               | 61.1      | 41.5         | 87.5            | 74.1      | 59.4         |
| AirGrainHNNH1ITS_MID_102_157  | KT886568                  | Sporobolomyces roseus                | 25.0               | 38.9      | 32.1         | 50.0            | 40.7      | 52.2         |
| AirGrainHNNH1ITS_MID_1_016    | KT886535                  | Cryptococcus wieringae               | 62.5               | 50.0      | 41.5         | 87.5            | 63.0      | 47.8         |
| AirGrainHNNH1ITS_MID_103_206  | KT886574                  | Cladosporium sp.                     | 37.5               | 27.8      | 37.7         | 37.5            | 40.7      | 43.5         |
| AirGrainHNNH1ITS_MID_1_497    | KT886552                  | Phaeosphaeria nodorum                | 37.5               | 33.3      | 22.6         | 50.0            | 77.8      | 39.1         |
| AirGrainHNNH1ITS_MID_136_233  | KT886630                  | Cryptococcus flavescens              | 12.5               | 5.6       | 15.1         | 37.5            | 29.6      | 37.7         |
| AirGrainHNNH3ITS2_MID_149_107 | KT886831                  | uncultured fungus                    | 25.0               | 33.3      | 17.0         | 50.0            | 33.3      | 37.7         |
| AirGrainHNNH1ITS_MID_109_036  | KT886590                  | uncultured Cryptococcus              | 12.5               | 16.7      | 13.2         | 25.0            | 22.2      | 36.2         |
| AirGrainHNNH1ITS_MID_102_069  | KT886565                  | Bulleromyces albus                   | 0.0                | 16.7      | 30.2         | 37.5            | 22.2      | 34.8         |
| AirGrainHNNH1ITS_MID_103_168  | KT886572                  | Acremonium sp.                       | 0.0                | 5.6       | 7.5          | 12.5            | 25.9      | 34.8         |
| AirGrainHNNH1ITS_MID_132_023  | KT886624                  | Cryptococcus carnescens              | 0.0                | 22.2      | 17.0         | 37.5            | 25.9      | 33.3         |

| OTU identifiant               | Genbank accession numbers | Species name                           | Aerosols sample, % |           |              | Grain Sample, % |           |              |
|-------------------------------|---------------------------|----------------------------------------|--------------------|-----------|--------------|-----------------|-----------|--------------|
|                               |                           |                                        | Organic            | Extensive | Conventional | Organic         | Extensive | Conventional |
| AirGrainHNNH1ITS_MID_115_224  | KT886599                  | Fusarium pulverosum                    | 12.5               | 22.2      | 15.1         | 12.5            | 25.9      | 30.4         |
| AirGrainHNNH3ITS2_MID_146_428 | KT886829                  | Alternaria conjuncta                   | 25.0               | 27.8      | 18.9         | 25.0            | 44.4      | 30.4         |
| AirGrainHNNH1ITS_MID_104_065  | KT886576                  | Dioszegia sp                           | 12.5               | 44.4      | 34.0         | 37.5            | 48.1      | 29.0         |
| AirGrainHNNH1ITS_MID_1_074    | KT886540                  | Udeniomyces pannonicus                 | 50.0               | 50.0      | 28.3         | 75.0            | 40.7      | 27.5         |
| AirGrainHNNH3ITS2_MID_11_0664 | KT886820                  | uncultured fungus                      | 50.0               | 22.2      | 20.8         | 12.5            | 29.6      | 27.5         |
| AirGrainHNNH1ITS_MID_101_075  | KT886559                  | Cryptococcus sp.                       | 12.5               | 27.8      | 18.9         | 50.0            | 40.7      | 26.1         |
| AirGrainHNNH2ITS_MID_91_366   | KT886812                  | uncultured fungus                      | 37.5               | 27.8      | 17.0         | 50.0            | 29.6      | 26.1         |
| AirGrainHNNH1ITS_MID_1_375    | KT886550                  | Cryptococcus macerans                  | 0.0                | 22.2      | 20.8         | 62.5            | 18.5      | 23.2         |
| AirGrainHNNH1ITS_MID_106_115  | KT886587                  | Dioszegia fristingensis                | 37.5               | 38.9      | 26.4         | 12.5            | 37.0      | 23.2         |
| AirGrainHNNH1ITS_MID_1_005    | KT886528                  | Sclerotinia sclerotiorum               | 37.5               | 16.7      | 9.4          | 37.5            | 11.1      | 21.7         |
| AirGrainHNNH1ITS_MID_1_131    | KT886544                  | Blumeria graminis                      | 0.0                | 16.7      | 9.4          | 25.0            | 29.6      | 21.7         |
| AirGrainHNNH1ITS_MID_105_239  | KT886584                  | Peyronellaea pinodella                 | 12.5               | 33.3      | 9.4          | 12.5            | 25.9      | 21.7         |
| AirGrainHNNH1ITS_MID_153_116  | KT886664                  | Lewia sp.                              | 12.5               | 5.6       | 9.4          | 0.0             | 22.2      | 20.3         |
| AirGrainHNNH2ITS_MID_91_256   | KT886811                  | uncultured fungus                      | 25.0               | 11.1      | 20.8         | 25.0            | 14.8      | 20.3         |
| AirGrainHNNH1ITS_MID_102_086  | KT886567                  | Phaeosphaeria avenaria f. sp. triticae | 0.0                | 11.1      | 3.8          | 37.5            | 59.3      | 18.8         |
| AirGrainHNNH2ITS_MID_41_328   | KT886788                  | uncultured fungus                      | 0.0                | 5.6       | 3.8          | 12.5            | 3.7       | 15.9         |
| AirGrainHNNH1ITS_MID_105_194  | KT886583                  | Cryptococcus oeirensis                 | 12.5               | 16.7      | 9.4          | 12.5            | 11.1      | 14.5         |
| AirGrainHNNH1ITS_MID_128_146  | KT886623                  | Pleospora herbarum                     | 0.0                | 0.0       | 7.5          | 12.5            | 11.1      | 14.5         |
| AirGrainHNNH1ITS_MID_151_161  | KT886658                  | uncultured Cryptococcus                | 0.0                | 5.6       | 5.7          | 0.0             | 11.1      | 14.5         |
| AirGrainHNNH1ITS_MID_33_177   | KT886681                  | uncultured fungus                      | 25.0               | 5.6       | 15.1         | 0.0             | 7.4       | 14.5         |
| AirGrainHNNH1ITS_MID_110_011  | KT886592                  | Bullera globispora                     | 12.5               | 16.7      | 7.5          | 25.0            | 18.5      | 13.0         |
| AirGrainHNNH2ITS_MID_41_316   | KT886787                  | uncultured fungus                      | 0.0                | 11.1      | 11.3         | 0.0             | 25.9      | 13.0         |
| AirGrainHNNH1ITS_MID_1_045    | KT886539                  | Claviceps purpurea                     | 0.0                | 0.0       | 0.0          | 50.0            | 11.1      | 11.6         |
| AirGrainHNNH1ITS_MID_100_002  | KT886553                  | Cryptococcus sp.                       | 0.0                | 16.7      | 9.4          | 12.5            | 14.8      | 11.6         |
| AirGrainHNNH1ITS_MID_5_325    | KT886707                  | Rhodotorula glutinis                   | 12.5               | 5.6       | 1.9          | 0.0             | 0.0       | 11.6         |
| AirGrainHNNH1ITS_MID_61_142   | KT886724                  | uncultured fungus                      | 12.5               | 11.1      | 13.2         | 12.5            | 0.0       | 11.6         |
| AirGrainHNNH2ITS_MID_107_421  | KT886748                  | uncultured Basidiomycota               | 12.5               | 22.2      | 7.5          | 25.0            | 18.5      | 11.6         |
| AirGrainHNNH2ITS_MID_152_810  | KT886771                  | uncultured fungus                      | 0.0                | 5.6       | 5.7          | 12.5            | 11.1      | 11.6         |
| AirGrainHNNH2ITS_MID_26_255   | KT886778                  | uncultured fungus                      | 0.0                | 11.1      | 1.9          | 25.0            | 18.5      | 11.6         |

| OTU identifiant               | Genbank accession numbers | Species name              | Aerosols sample, % |           |              | Grain Sample, % |           |              |
|-------------------------------|---------------------------|---------------------------|--------------------|-----------|--------------|-----------------|-----------|--------------|
|                               |                           |                           | Organic            | Extensive | Conventional | Organic         | Extensive | Conventional |
| AirGrainHNNH1ITS_MID_1_111    | KT886543                  | Dioszegia crocea          | 12.5               | 27.8      | 7.5          | 25.0            | 14.8      | 10.1         |
| AirGrainHNNH1ITS_MID_120_249  | KT886604                  | uncultured Cryptococcus   | 25.0               | 33.3      | 15.1         | 25.0            | 7.4       | 10.1         |
| AirGrainHNNH1ITS_MID_136_224  | KT886629                  | Sporidiobolus sp.         | 0.0                | 5.6       | 1.9          | 0.0             | 0.0       | 10.1         |
| AirGrainHNNH1ITS_MID_76_369   | KT886735                  | uncultured fungus         | 12.5               | 0.0       | 0.0          | 0.0             | 0.0       | 10.1         |
| AirGrainHNNH2ITS_MID_110_077  | KT886753                  | uncultured fungus         | 12.5               | 22.2      | 17.0         | 0.0             | 14.8      | 10.1         |
| AirGrainHNNH2ITS_MID_152_331  | KT886770                  | uncultured fungus         | 0.0                | 5.6       | 9.4          | 37.5            | 18.5      | 10.1         |
| AirGrainHNNH1ITS_MID_144_017  | KT886642                  | uncultured fungus         | 0.0                | 5.6       | 0.0          | 25.0            | 0.0       | 8.7          |
| AirGrainHNNH1ITS_MID_148_226  | KT886651                  | Cryptococcus foliicola    | 0.0                | 11.1      | 5.7          | 0.0             | 22.2      | 8.7          |
| AirGrainHNNH1ITS_MID_151_226  | KT886660                  | uncultured fungus         | 12.5               | 0.0       | 7.5          | 0.0             | 0.0       | 8.7          |
| AirGrainHNNH1ITS_MID_47_938   | KT886703                  | uncultured fungus         | 12.5               | 5.6       | 1.9          | 0.0             | 7.4       | 8.7          |
| AirGrainHNNH1ITS_MID_1_151    | KT886546                  | uncultured fungus         | 0.0                | 5.6       | 1.9          | 12.5            | 0.0       | 7.2          |
| AirGrainHNNH1ITS_MID_103_194  | KT886573                  | uncultured fungus         | 0.0                | 5.6       | 7.5          | 0.0             | 11.1      | 7.2          |
| AirGrainHNNH1ITS_MID_104_215  | KT886581                  | uncultured fungus         | 0.0                | 11.1      | 1.9          | 0.0             | 11.1      | 7.2          |
| AirGrainHNNH1ITS_MID_106_004  | KT886585                  | uncultured fungus         | 0.0                | 0.0       | 0.0          | 0.0             | 25.9      | 7.2          |
| AirGrainHNNH1ITS_MID_142_024  | KT886635                  | Sporobolomyces sp.        | 12.5               | 22.2      | 5.7          | 25.0            | 11.1      | 7.2          |
| AirGrainHNNH3ITS2_MID_149_087 | KT886830                  | uncultured Ascomycota     | 0.0                | 5.6       | 1.9          | 0.0             | 7.4       | 7.2          |
| AirGrainHNNH1ITS_MID_104_180  | KT886580                  | Cryptococcus ater         | 0.0                | 5.6       | 3.8          | 50.0            | 3.7       | 5.8          |
| AirGrainHNNH1ITS_MID_143_185  | KT886641                  | Ramularia collo-cygni     | 12.5               | 0.0       | 1.9          | 25.0            | 7.4       | 5.8          |
| AirGrainHNNH1ITS_MID_151_385  | KT886661                  | Chalastospora ellipsoidea | 0.0                | 0.0       | 1.9          | 12.5            | 3.7       | 5.8          |
| AirGrainHNNH1ITS_MID_39_046   | KT886694                  | uncultured Basidiomycota  | 12.5               | 0.0       | 1.9          | 12.5            | 11.1      | 5.8          |
| AirGrainHNNH1ITS_MID_74_004   | KT886731                  | uncultured fungus         | 0.0                | 0.0       | 0.0          | 0.0             | 3.7       | 5.8          |
| AirGrainHNNH2ITS_MID_45_180   | KT886790                  | uncultured fungus         | 0.0                | 0.0       | 1.9          | 0.0             | 0.0       | 5.8          |
| AirGrainHNNH2ITS_MID_70_243   | KT886807                  | uncultured fungus         | 0.0                | 5.6       | 0.0          | 0.0             | 0.0       | 5.8          |
| AirGrainHNNH3ITS2_MID_23_054  | KT886839                  | uncultured fungus         | 12.5               | 5.6       | 7.5          | 25.0            | 0.0       | 5.8          |
| AirGrainHNNH1ITS_MID_103_145  | KT886571                  | uncultured fungus         | 0.0                | 0.0       | 0.0          | 0.0             | 0.0       | 4.3          |
| AirGrainHNNH1ITS_MID_123_218  | KT886615                  | uncultured fungus         | 0.0                | 11.1      | 0.0          | 0.0             | 0.0       | 4.3          |
| AirGrainHNNH1ITS_MID_127_230  | KT886621                  | uncultured fungus         | 12.5               | 0.0       | 3.8          | 12.5            | 0.0       | 4.3          |
| AirGrainHNNH1ITS_MID_148_311  | KT886653                  | uncultured fungus         | 12.5               | 0.0       | 0.0          | 0.0             | 0.0       | 4.3          |
| AirGrainHNNH1ITS_MID_150_301  | KT886655                  | uncultured fungus         | 0.0                | 5.6       | 7.5          | 0.0             | 3.7       | 4.3          |



| OTU identifiant               | Genbank accession numbers | Species name                | Aerosols sample, % |           |              | Grain Sample, % |           |              |
|-------------------------------|---------------------------|-----------------------------|--------------------|-----------|--------------|-----------------|-----------|--------------|
|                               |                           |                             | Organic            | Extensive | Conventional | Organic         | Extensive | Conventional |
| AirGrainHNNH1ITS_MID_22_095   | KT886672                  | Microdochium bolleyi        | 12.5               | 0.0       | 1.9          | 0.0             | 0.0       | 4.3          |
| AirGrainHNNH1ITS_MID_37_387   | KT886690                  | uncultured Ascomycete       | 0.0                | 0.0       | 0.0          | 12.5            | 0.0       | 4.3          |
| AirGrainHNNH1ITS_MID_42_181   | KT886698                  | uncultured fungus           | 0.0                | 5.6       | 1.9          | 0.0             | 3.7       | 4.3          |
| AirGrainHNNH1ITS_MID_43_084   | KT886699                  | Phoma herbarum              | 0.0                | 0.0       | 0.0          | 25.0            | 0.0       | 4.3          |
| AirGrainHNNH1ITS_MID_50_048   | KT886709                  | uncultured Ascomycota       | 0.0                | 0.0       | 0.0          | 0.0             | 3.7       | 4.3          |
| AirGrainHNNH1ITS_MID_74_144   | KT886732                  | uncultured fungus           | 0.0                | 0.0       | 5.7          | 25.0            | 14.8      | 4.3          |
| AirGrainHNNH2ITS_MID_11_296   | KT886752                  | uncultured fungus           | 12.5               | 5.6       | 3.8          | 12.5            | 18.5      | 4.3          |
| AirGrainHNNH3ITS2_MID_10_0836 | KT886817                  | Gibberella avenacea         | 0.0                | 0.0       | 0.0          | 0.0             | 0.0       | 4.3          |
| AirGrainHNNH1ITS_MID_1_278    | KT886548                  | Nigrospora oryzae           | 12.5               | 5.6       | 5.7          | 37.5            | 7.4       | 2.9          |
| AirGrainHNNH1ITS_MID_100_085  | KT886554                  | Filobasidium floriforme     | 0.0                | 0.0       | 3.8          | 0.0             | 0.0       | 2.9          |
| AirGrainHNNH1ITS_MID_100_112  | KT886555                  | uncultured fungus           | 12.5               | 5.6       | 0.0          | 0.0             | 0.0       | 2.9          |
| AirGrainHNNH1ITS_MID_101_093  | KT886560                  | uncultured Ascomycota       | 0.0                | 5.6       | 1.9          | 0.0             | 0.0       | 2.9          |
| AirGrainHNNH1ITS_MID_110_165  | KT886593                  | Pyrenophora sp              | 0.0                | 0.0       | 0.0          | 0.0             | 0.0       | 2.9          |
| AirGrainHNNH1ITS_MID_122_011  | KT886608                  | Sporidiobolus pararoseus    | 0.0                | 0.0       | 0.0          | 0.0             | 0.0       | 2.9          |
| AirGrainHNNH1ITS_MID_123_032  | KT886614                  | uncultured fungus           | 0.0                | 0.0       | 3.8          | 0.0             | 3.7       | 2.9          |
| AirGrainHNNH1ITS_MID_127_066  | KT886619                  | Microdochium nivale         | 0.0                | 5.6       | 7.5          | 0.0             | 3.7       | 2.9          |
| AirGrainHNNH1ITS_MID_142_212  | KT886636                  | uncultured Ascomycota       | 0.0                | 5.6       | 0.0          | 0.0             | 3.7       | 2.9          |
| AirGrainHNNH1ITS_MID_30_068   | KT886676                  | uncultured fungus           | 0.0                | 0.0       | 3.8          | 0.0             | 0.0       | 2.9          |
| AirGrainHNNH1ITS_MID_33_169   | KT886680                  | Udeniomyces pyricola        | 0.0                | 5.6       | 0.0          | 25.0            | 3.7       | 2.9          |
| AirGrainHNNH1ITS_MID_35_282   | KT886687                  | Plectosphaerella cucumerina | 0.0                | 0.0       | 0.0          | 0.0             | 0.0       | 2.9          |
| AirGrainHNNH1ITS_MID_38_073   | KT886692                  | Phoma exigua                | 12.5               | 0.0       | 0.0          | 0.0             | 0.0       | 2.9          |
| AirGrainHNNH1ITS_MID_48_284   | KT886705                  | uncultured Phaeosphaeria    | 0.0                | 0.0       | 0.0          | 0.0             | 0.0       | 2.9          |
| AirGrainHNNH1ITS_MID_6_397    | KT886721                  | uncultured Cryptococcus     | 0.0                | 0.0       | 3.8          | 0.0             | 0.0       | 2.9          |
| AirGrainHNNH1ITS_MID_79_046   | KT886740                  | uncultured Basidiomycota    | 0.0                | 5.6       | 0.0          | 0.0             | 0.0       | 2.9          |
| AirGrainHNNH2ITS_MID_108_033  | KT886749                  | uncultured Cryptococcus     | 0.0                | 0.0       | 0.0          | 0.0             | 3.7       | 2.9          |
| AirGrainHNNH2ITS_MID_108_206  | KT886750                  | uncultured Basidiomycota    | 0.0                | 5.6       | 0.0          | 0.0             | 0.0       | 2.9          |
| AirGrainHNNH2ITS_MID_114_260  | KT886758                  | Sporobolomyces sp.          | 0.0                | 0.0       | 0.0          | 12.5            | 0.0       | 2.9          |
| AirGrainHNNH2ITS_MID_130_127  | KT886766                  | Sporidiobolales sp.         | 0.0                | 0.0       | 0.0          | 0.0             | 0.0       | 2.9          |
| AirGrainHNNH2ITS_MID_152_875  | KT886772                  | uncultured fungus           | 0.0                | 0.0       | 0.0          | 12.5            | 3.7       | 2.9          |

| OTU identifiant              | Genbank accession numbers | Species name             | Aerosols sample, % |           |              | Grain Sample, % |           |              |
|------------------------------|---------------------------|--------------------------|--------------------|-----------|--------------|-----------------|-----------|--------------|
|                              |                           |                          | Organic            | Extensive | Conventional | Organic         | Extensive | Conventional |
| AirGrainH2H2ITS_MID_34_242   | KT886781                  | uncultured fungus        | 0.0                | 0.0       | 0.0          | 0.0             | 0.0       | 2.9          |
| AirGrainH2H2ITS_MID_4_394    | KT886785                  | uncultured fungus        | 0.0                | 11.1      | 3.8          | 0.0             | 3.7       | 2.9          |
| AirGrainH2H2ITS_MID_41_125   | KT886786                  | uncultured Ascomycota    | 0.0                | 0.0       | 0.0          | 0.0             | 0.0       | 2.9          |
| AirGrainH2H2ITS_MID_61_050   | KT886795                  | uncultured fungus        | 12.5               | 0.0       | 1.9          | 37.5            | 3.7       | 2.9          |
| AirGrainH2H2ITS_MID_62_203   | KT886796                  | uncultured fungus        | 0.0                | 0.0       | 7.5          | 0.0             | 7.4       | 2.9          |
| AirGrainH2H2ITS_MID_63_072   | KT886798                  | uncultured Cryptococcus  | 0.0                | 0.0       | 0.0          | 0.0             | 0.0       | 2.9          |
| AirGrainH2H2ITS_MID_7_018    | KT886804                  | Cladosporium herbarum    | 0.0                | 0.0       | 0.0          | 12.5            | 0.0       | 2.9          |
| AirGrainH2H2ITS_MID_70_193   | KT886805                  | Fusarium equiseti        | 0.0                | 0.0       | 0.0          | 0.0             | 7.4       | 2.9          |
| AirGrainH2H2ITS_MID_79_618   | KT886809                  | Cladosporium cucumerinum | 0.0                | 0.0       | 0.0          | 0.0             | 0.0       | 2.9          |
| AirGrainH2H3ITS2_MID_1_304   | KT886813                  | uncultured fungus        | 0.0                | 0.0       | 0.0          | 0.0             | 0.0       | 2.9          |
| AirGrainH2H3ITS2_MID_1_362   | KT886814                  | uncultured fungus        | 0.0                | 0.0       | 0.0          | 0.0             | 0.0       | 2.9          |
| AirGrainH2H3ITS2_MID_150_499 | KT886834                  | Chalastospora cetera     | 0.0                | 0.0       | 0.0          | 0.0             | 0.0       | 2.9          |
| AirGrainH1H1ITS_MID_1_144    | KT886545                  | uncultured fungus        | 0.0                | 0.0       | 0.0          | 0.0             | 0.0       | 1.4          |
| AirGrainH1H1ITS_MID_1_480    | KT886551                  | uncultured Ascomycota    | 0.0                | 0.0       | 0.0          | 0.0             | 3.7       | 1.4          |
| AirGrainH1H1ITS_MID_102_056  | KT886564                  | uncultured Basidiomycota | 0.0                | 0.0       | 0.0          | 0.0             | 3.7       | 1.4          |
| AirGrainH1H1ITS_MID_103_021  | KT886570                  | uncultured fungus        | 0.0                | 5.6       | 0.0          | 0.0             | 0.0       | 1.4          |
| AirGrainH1H1ITS_MID_103_246  | KT886575                  | uncultured Cryptococcus  | 0.0                | 5.6       | 1.9          | 0.0             | 0.0       | 1.4          |
| AirGrainH1H1ITS_MID_106_112  | KT886586                  | uncultured fungus        | 0.0                | 0.0       | 3.8          | 0.0             | 0.0       | 1.4          |
| AirGrainH1H1ITS_MID_107_037  | KT886588                  | uncultured Ascomycota    | 0.0                | 5.6       | 1.9          | 0.0             | 7.4       | 1.4          |
| AirGrainH1H1ITS_MID_108_159  | KT886589                  | uncultured fungus        | 0.0                | 0.0       | 1.9          | 0.0             | 0.0       | 1.4          |
| AirGrainH1H1ITS_MID_114_047  | KT886595                  | uncultured fungus        | 0.0                | 0.0       | 0.0          | 0.0             | 3.7       | 1.4          |
| AirGrainH1H1ITS_MID_114_078  | KT886596                  | Alternaria brassicae     | 0.0                | 0.0       | 3.8          | 0.0             | 0.0       | 1.4          |
| AirGrainH1H1ITS_MID_116_024  | KT886601                  | uncultured fungus        | 0.0                | 0.0       | 0.0          | 0.0             | 3.7       | 1.4          |
| AirGrainH1H1ITS_MID_121_039  | KT886606                  | Choiromyces venosus      | 0.0                | 0.0       | 1.9          | 0.0             | 0.0       | 1.4          |
| AirGrainH1H1ITS_MID_122_185  | KT886610                  | uncultured Cryptococcus  | 0.0                | 5.6       | 3.8          | 0.0             | 0.0       | 1.4          |
| AirGrainH1H1ITS_MID_123_028  | KT886612                  | uncultured fungus        | 0.0                | 0.0       | 1.9          | 0.0             | 0.0       | 1.4          |
| AirGrainH1H1ITS_MID_123_286  | KT886616                  | uncultured fungus        | 0.0                | 0.0       | 0.0          | 0.0             | 0.0       | 1.4          |
| AirGrainH1H1ITS_MID_123_288  | KT886617                  | uncultured fungus        | 0.0                | 0.0       | 1.9          | 0.0             | 0.0       | 1.4          |
| AirGrainH1H1ITS_MID_136_214  | KT886628                  | Acremonium sp            | 0.0                | 0.0       | 3.8          | 0.0             | 0.0       | 1.4          |

| OTU identifiant               | Genbank accession numbers | Species name                 | Aerosols sample, % |           |              | Grain Sample, % |           |              |
|-------------------------------|---------------------------|------------------------------|--------------------|-----------|--------------|-----------------|-----------|--------------|
|                               |                           |                              | Organic            | Extensive | Conventional | Organic         | Extensive | Conventional |
| AirGrainHNNH1ITS_MID_145_019  | KT886643                  | uncultured fungus            | 0.0                | 0.0       | 0.0          | 0.0             | 7.4       | 1.4          |
| AirGrainHNNH1ITS_MID_147_516  | KT886649                  | uncultured fungus            | 0.0                | 0.0       | 1.9          | 0.0             | 0.0       | 1.4          |
| AirGrainHNNH1ITS_MID_148_046  | KT886650                  | uncultured fungus            | 0.0                | 0.0       | 1.9          | 12.5            | 0.0       | 1.4          |
| AirGrainHNNH1ITS_MID_17_125   | KT886666                  | uncultured fungus            | 0.0                | 0.0       | 0.0          | 0.0             | 7.4       | 1.4          |
| AirGrainHNNH1ITS_MID_2_039    | KT886668                  | uncultured fungus            | 0.0                | 5.6       | 1.9          | 0.0             | 0.0       | 1.4          |
| AirGrainHNNH1ITS_MID_2_099    | KT886669                  | Microbotryum duriaeanum      | 0.0                | 0.0       | 1.9          | 0.0             | 0.0       | 1.4          |
| AirGrainHNNH1ITS_MID_26_058   | KT886673                  | uncultured fungus            | 12.5               | 0.0       | 0.0          | 12.5            | 3.7       | 1.4          |
| AirGrainHNNH1ITS_MID_30_136   | KT886677                  | uncultured fungus            | 12.5               | 0.0       | 3.8          | 0.0             | 0.0       | 1.4          |
| AirGrainHNNH1ITS_MID_32_319   | KT886679                  | uncultured fungus            | 0.0                | 0.0       | 0.0          | 12.5            | 0.0       | 1.4          |
| AirGrainHNNH1ITS_MID_35_075   | KT886685                  | uncultured fungus            | 0.0                | 0.0       | 0.0          | 0.0             | 7.4       | 1.4          |
| AirGrainHNNH1ITS_MID_5_537    | KT886708                  | uncultured fungus            | 0.0                | 0.0       | 3.8          | 0.0             | 0.0       | 1.4          |
| AirGrainHNNH1ITS_MID_58_025   | KT886718                  | uncultured Tremellomycetes   | 0.0                | 0.0       | 1.9          | 12.5            | 0.0       | 1.4          |
| AirGrainHNNH1ITS_MID_65_093   | KT886726                  | uncultured fungus            | 0.0                | 0.0       | 3.8          | 0.0             | 3.7       | 1.4          |
| AirGrainHNNH1ITS_MID_77_207   | KT886737                  | uncultured Cryptococcus      | 0.0                | 5.6       | 0.0          | 0.0             | 0.0       | 1.4          |
| AirGrainHNNH1ITS_MID_91_724   | KT886744                  | uncultured fungus            | 0.0                | 0.0       | 5.7          | 0.0             | 0.0       | 1.4          |
| AirGrainHNNH2ITS_MID_114_131  | KT886757                  | uncultured Pleosporales      | 0.0                | 0.0       | 0.0          | 0.0             | 3.7       | 1.4          |
| AirGrainHNNH2ITS_MID_116_298  | KT886760                  | uncultured fungus            | 0.0                | 0.0       | 0.0          | 12.5            | 0.0       | 1.4          |
| AirGrainHNNH2ITS_MID_152_063  | KT886768                  | Rhodotorula sp.              | 0.0                | 0.0       | 0.0          | 25.0            | 7.4       | 1.4          |
| AirGrainHNNH2ITS_MID_19_120   | KT886774                  | Phaeosphaeria pontiformis    | 0.0                | 0.0       | 0.0          | 0.0             | 0.0       | 1.4          |
| AirGrainHNNH2ITS_MID_32_508   | KT886780                  | uncultured fungus            | 12.5               | 0.0       | 0.0          | 0.0             | 0.0       | 1.4          |
| AirGrainHNNH2ITS_MID_36_275   | KT886782                  | Stagonospora sp.             | 0.0                | 0.0       | 0.0          | 12.5            | 0.0       | 1.4          |
| AirGrainHNNH2ITS_MID_39_391   | KT886784                  | uncultured fungus            | 0.0                | 0.0       | 0.0          | 0.0             | 3.7       | 1.4          |
| AirGrainHNNH3ITS2_MID_151_557 | KT886835                  | uncultured fungus            | 0.0                | 0.0       | 0.0          | 0.0             | 0.0       | 1.4          |
| AirGrainHNNH1ITS_MID_1_107    | KT886542                  | uncultured fungus            | 0.0                | 11.1      | 0.0          | 0.0             | 0.0       | 0.0          |
| AirGrainHNNH1ITS_MID_1_269    | KT886547                  | uncultured fungus            | 0.0                | 5.6       | 0.0          | 12.5            | 0.0       | 0.0          |
| AirGrainHNNH1ITS_MID_100_181  | KT886556                  | uncultured endophytic fungus | 0.0                | 0.0       | 1.9          | 0.0             | 0.0       | 0.0          |
| AirGrainHNNH1ITS_MID_101_132  | KT886561                  | uncultured Didymella         | 0.0                | 0.0       | 0.0          | 0.0             | 7.4       | 0.0          |
| AirGrainHNNH1ITS_MID_102_032  | KT886563                  | uncultured fungus            | 12.5               | 0.0       | 3.8          | 0.0             | 0.0       | 0.0          |
| AirGrainHNNH1ITS_MID_104_169  | KT886578                  | uncultured fungus            | 0.0                | 5.6       | 0.0          | 0.0             | 3.7       | 0.0          |

| OTU identifiant              | Genbank accession numbers | Species name               | Aerosols sample, % |           |              | Grain Sample, % |           |              |
|------------------------------|---------------------------|----------------------------|--------------------|-----------|--------------|-----------------|-----------|--------------|
|                              |                           |                            | Organic            | Extensive | Conventional | Organic         | Extensive | Conventional |
| AirGrainHNNH1ITS_MID_104_175 | KT886579                  | uncultured fungus          | 12.5               | 0.0       | 0.0          | 0.0             | 0.0       | 0.0          |
| AirGrainHNNH1ITS_MID_109_094 | KT886591                  | uncultured Cryptococcus    | 0.0                | 0.0       | 3.8          | 0.0             | 0.0       | 0.0          |
| AirGrainHNNH1ITS_MID_113_031 | KT886594                  | uncultured fungus          | 0.0                | 0.0       | 0.0          | 0.0             | 3.7       | 0.0          |
| AirGrainHNNH1ITS_MID_121_010 | KT886605                  | Leptosphaerulina sp.       | 0.0                | 0.0       | 5.7          | 0.0             | 0.0       | 0.0          |
| AirGrainHNNH1ITS_MID_135_048 | KT886626                  | uncultured fungus          | 0.0                | 5.6       | 0.0          | 0.0             | 3.7       | 0.0          |
| AirGrainHNNH1ITS_MID_136_021 | KT886627                  | uncultured fungus          | 0.0                | 5.6       | 1.9          | 0.0             | 3.7       | 0.0          |
| AirGrainHNNH1ITS_MID_137_049 | KT886631                  | uncultured Basidiomycota   | 0.0                | 5.6       | 0.0          | 0.0             | 3.7       | 0.0          |
| AirGrainHNNH1ITS_MID_141_178 | KT886634                  | uncultured fungus          | 0.0                | 0.0       | 0.0          | 0.0             | 3.7       | 0.0          |
| AirGrainHNNH1ITS_MID_143_009 | KT886638                  | Capronia semiimmersa       | 0.0                | 0.0       | 1.9          | 12.5            | 0.0       | 0.0          |
| AirGrainHNNH1ITS_MID_143_018 | KT886639                  | Eurotium amstelodami       | 0.0                | 0.0       | 1.9          | 12.5            | 0.0       | 0.0          |
| AirGrainHNNH1ITS_MID_34_112  | KT886683                  | uncultured fungus          | 0.0                | 0.0       | 0.0          | 0.0             | 14.8      | 0.0          |
| AirGrainHNNH1ITS_MID_48_184  | KT886704                  | Drechslera avenae          | 12.5               | 0.0       | 0.0          | 12.5            | 0.0       | 0.0          |
| AirGrainHNNH1ITS_MID_50_470  | KT886710                  | Lophodermium actinothyrium | 0.0                | 0.0       | 0.0          | 0.0             | 3.7       | 0.0          |
| AirGrainHNNH1ITS_MID_50_851  | KT886711                  | Coniothyrium sp.           | 12.5               | 0.0       | 0.0          | 0.0             | 3.7       | 0.0          |
| AirGrainHNNH1ITS_MID_55_126  | KT886716                  | Hypocreales sp.            | 12.5               | 0.0       | 0.0          | 0.0             | 0.0       | 0.0          |
| AirGrainHNNH1ITS_MID_74_293  | KT886734                  | Acremonium rutilum         | 12.5               | 0.0       | 0.0          | 0.0             | 3.7       | 0.0          |
| AirGrainHNNH1ITS_MID_78_106  | KT886738                  | uncultured Ascomycota      | 0.0                | 0.0       | 0.0          | 0.0             | 7.4       | 0.0          |
| AirGrainHNNH2ITS_MID_104_154 | KT886747                  | uncultured Taphrina        | 0.0                | 0.0       | 0.0          | 0.0             | 7.4       | 0.0          |
| AirGrainHNNH2ITS_MID_70_215  | KT886806                  | Penicillium sp.            | 0.0                | 0.0       | 0.0          | 0.0             | 3.7       | 0.0          |
| AirGrainHNNH3ITS2_MID_2_459  | KT886838                  | uncultured Cryptococcus    | 0.0                | 5.6       | 0.0          | 0.0             | 7.4       | 0.0          |
